# Supplementary material for: Competing for space? - A multi-criteria scenario framework to model the energy-biodiversity-land nexus for regional renewable energy planning on a German case
Source: Research Square preprint supplement (doi:10.21203/rs.3.rs-2599221/v1), 2023-05-30
Supplement: Supplementary file 1 [file Supplemental Materials_Excel model_R1_JW.xlsx]

## Sheet:  Scenarios RK Top 5
	Scenario analysis
	Status: December 2022
	input parameters
	planning region		Region Havelland-Fläming BB	Region Havelland-Fläming BB	Region Havelland-Fläming BB
	Area size (km2)		6842	6842	6842
	spatial targets WT
	Area share Brandenburg and thus Havelland-Fläming (%)		2.2	1.8	2
	target year		2032 (WaLG)	2027 (WaLG)	2030 (energy strategy BB2030)
	spatial targets PV
	Power (GW) for PV assuming a distribution key of 1:1 roof PV		107.5	86
	Capacity Brandenburg with federal state distribution key 1:13 (GW)		8.26923	6.61538	9
	shareal capacity Havelland-Fläming (1:4) (GW)		2.06731	1.65385	2.25
	Area requirement in km2		20.8819	16.7055	22.7273
	Area share Havelland-Fläming (%)		0.305202	0.244161	0.332173
			EEG2023 to 2030	EEG2023 to 2028	Energy strategy BB 2040 bis2040
	reference systems
	WT area requirements (MW/km2)		29.3	29.3	29.3
	WT plant size (MW)		5	5	5
	WT rotor diameter (m)		149	149	149
	PV EEG base areas (MWp/km2)		99	99	99
	PV Agriculture (MWp/km2)		40	40	40
	PV vertical (MWp/km2)		35	35	35
	Sub-scenario parameters
	share of built-up area in bird priority zones (%)		0	0	0
	share of built-up area in bird priority zones (%)		5	5	5
	share of built-up area in bird priority zones (%)		10	10	10
	share of built-up area in bird priority zones (%)		0.24	0.24	0.24
	share of built-up area in bird priority zones (%)		0.31	0.31	0.31
	share of built-up area in bird priority zones (%)		0.63	0.63	0.63
	Additional potential in bird priority zones on efficient sites (km2)		172.69	172.69	172.69
	Percentage of area WTs in bird priority zones when wind speed >5.5 m/s (%)		10	10	10
	Percentage of area WTs in bird priority zones when wind speed >5.5 m/s (%)		5	5	5
	Wind systems in bird priority zones if they are installed in a 1 km strip with a BImSch buffer of 800 m (km2)		211	211	211
	Additional potential in bird priority zones on sites that serve the grid (km2)		0.276	0.276	0.276
	Percentage of potential PV power in bird priority zones (%)		0	0	0
	Percentage of potential PV power in bird priority zones (%)		10	10	10
	Percentage of potential PV power in bird priority zones (%)		20	20	20
	Percentage of possible output of veRKical PV in bird priority zones (%)		5	5	5
	Percentage of possible output of veRKical PV in bird priority zones (%)		10	10	10
	Percentage of possible output of veRKical PV in bird priority zones (%)		20	20	20
	Percentage of possible output of Agri PV in bird priority zones (%)		0	0	0
	Percentage of possible output of Agri PV in bird priority zones (%)		10	10	10
	Percentage of possible output of Agri PV in bird priority zones (%)		20	20	20
	Space requirement taboo criteria (km2)		0	0	0
	Area potential for wind systems with a settlement distance of 800 m without species-specific buffers (km2)		287	287	287
	Area potential for wind systems with forest area (coniferous forest), available with negative planning of fuRKher criteria and exclusion of bird priority zones, without species-specific buffers		226	226	226
	Area size of coniferous forest without bird priority zones (RK Top 5)		1732.59	1732.59	1732.59
	Percentage of forest area with wind systems and exclusion of bird priority zones (%)		4	4	4
	Percentage of forest area with wind systems and exclusion of bird priority zones (%)		2	2	2
	Area size landscape protection areas (km2)		3103.14	3103.14	3103.14
	Area size landscape protection areas without bird priority zones (km2)		3556.45	3556.45	3556.45
	Share of area size in landscape protection areas (km2)		3	3	3
	Share of area size in landscape protection areas (km2)		1	1	1
	Area of the nature park (km2)		2242.42	2242.42	2242.42
	Area size of nature park without bird priority zones (exclusion?) (km2)		2519.99	2519.99	2519.99
	Percentage of area in nature park (km2)		2	2	2
	Percentage of area in nature park (km2)		4	4	4
	Size of open space areas (km2)		1835.88	1835.88	1835.88
	Size of open space areas without bird priority zones (exclusion) (km2)
	Share of area size in open space areas (km2)		2	2	2
	Share of area size in open space areas (km2)		4	4	4
	Output of existing systems in bird priority zones RK V1 Top 5 (MW)		0	0	0
	Percentage of repowering (%) (200% repowering)		2	2	2
	share of dismantling (%) (50% dismantling)		2	2	2
	Size hotspots Approach
	Area requirement bird priority zones approach RK 1 Top 5 (km2)		426.14	426.14	426.14
1	Status quo WT exclusion planning with bird priority zones RK Top 5
	Area potential for wind systems without species-specific buffers (km2)		234	234	234
	species buffer correction factor according to regional plan 3.0 HF		0.58	0.58	0.58
	Conclusion species buffer-free area		0.42	0.42	0.42
	Area potential for wind systems with species buffer correction factor (km2)		98.28	98.28	98.28
	Area potential wind systems with species buffer correction factor (%)		1.43642	1.43642	1.43642
	Installable power (MW)		2879.6	2879.6	2879.6
	attachment count		575.921	575.921	575.921
2	Review of exclusion planning without wind systems (exclusion) in white areas - with existing systems?? (!)
	White area (km2)		234	234	234
	White area with species buffer correction factor (km2)		98.28	98.28	98.28
	White area with species buffer correction factor (%)		1.43642	1.43642	1.43642
3	Status quo exclusion planning WT WITHOUT bird priority zones RK Top 5 - white area in bird priority zones
	White area in bird priority zones (km2) without species buffer correction		2.46	2.46	2.46
	Percentage of white area in the region (%)		0.0359544	0.0359544	0.0359544
	species buffer correction factor according to regional plan 3.0 HF		0.58	0.58	0.58
	Conclusion species buffer-free area		0.42	0.42	0.42
	Area potential for wind systems with species buffer correction factor (km2)		1.0332	1.0332	1.0332
	Area potential wind systems with species buffer correction factor (%)		0.242456	0.242456	0.242456
	Installable power (MW)		30.2728	30.2728	30.2728
	attachment count		6.05455	6.05455	6.05455
	Is white space in bird priority zones a lot compared to the total white space in the region?
	White area in bird priority zones approach (km2)		1.0332
	Total white area region excluding bird priority zones (km2)		99.54
	Percentage of bird hotspot white area to region white area (km2)		98.5068
	Percentage of bird priority zones white space in regions white space (%)		1.03797
	How big is the perfoRKance potential that is blocked in bird priority zones?
	Blocked power potential in MW/km2		30.2728
	Blocked attachment count		6.05455
4	Status Quo Exclusion planning WT WITHOUT all bird priority zones
	White area without bird priority zones without species-specific buffers (km2)		237	237	237
	species buffer correction factor according to regional plan 3.0 HF		0.58	0.58	0.58
	Conclusion species buffer-free area		0.42	0.42	0.42
	Area potential for wind systems with species buffer correction factor (km2)		99.54	99.54	99.54
	Area potential wind systems with species buffer correction factor (%)		1.45484	1.45484	1.45484
	Installable power (MW)		2916.52	2916.52	2916.52
	attachment count		583.304	583.304	583.304
	Examination of exclusion planning without wind systems in white areas - status quo without all bird priority zones
	White area (km2)		237
	White area with species buffer correction factor (km2)		99.54
	White area with species buffer correction factor (%)		1.45484
	How much more can be built into the forest?
	Coniferous forest in white areas depending on the bird priority zones approach (km2)		159	159	159
	Coniferous forest in the region excluding bird priority zones (km2)		1732.59	1732.59	1732.59
	Remaining coniferous forest (km2)		1573.59	1573.59	1573.59
	Share of coniferous forest in white area of the total coniferous forest (%)		9.17701	9.17701	9.17701
	How much more can be built into the forest?
	Coniferous forest in white areas after BAU (km2)		161
	Coniferous forest in the region (km2)		2021.17
	Remaining coniferous forest (km2)		1860.17
	Share of coniferous forest in white area of the total coniferous forest (%)		7.96568
	How much white space is in the individual planning parameters?
	landscape protection areas km2		1634.82
	landscape protection areas sum		3556.45
	landscape protection areas % of landscape protection areas total		45.9677
	Area share of required wind turbine area %		10.3289
	nature park km2		1198.99
	nature park sum		2519.99
	nature park % of nature park total		47.5792
	Area share of required wind turbine area %		14.2985
	coniferous forest km2		1139.36
	coniferous forest sum		2021.17
	coniferous forest % of Total		56.3713
	Area share of required wind turbine area %		12.9392
	open space km2		1118.27
	Total open space		2119
	open space % of total		52.7735
	Area share of required wind turbine area %		14.0257
	Status Quo EEG base areas PV bird hotspots RK TOP 5
	Output potential on EEG base areas (MWp)		3807	3807	3807
	Area potential PV EEG base areas (km2)		38.4545	38.4545	38.4545
	Assumed expansion potential PV in bird hotspots RK V1 (grid) (MWp)		978.95	978.95	978.95
	Assumed expansion potential PV in bird hotspots RK V1 (grid) (km2)		9.88838	9.88838	9.88838
	Remaining PV expansion potential outside of bird hotspots (grid) (MWp)		2828.05	2828.05	2828.05
	Remaining PV expansion potential outside of bird hotspots (grid) (km2)		28.5662	28.5662	28.5662
	Status Quo Agri PV bird hotspots RK TOP 5
	PerfoRKance potential on agricultural land (number of fields > 23) (MWp)		4969	4969	4969
	Area potential PV EEG base areas (km2)		124.225	124.225	124.225
	Assumed expansion potential PV in bird hotspots RK V1 (grid) (MWp)		1277.74	1277.74	1277.74
	Assumed expansion potential PV in bird hotspots RK V1 (grid) (km2)		12.9065	12.9065	12.9065
	Remaining PV expansion potential outside of bird hotspots (grid) (MWp)		3691.26	3691.26	3691.26
	Remaining PV expansion potential outside of bird hotspots (grid) (km2)		37.2855	37.2855	37.2855
	Scenario Outcomes
	energy target dimensions		Alternate A.D1	Alternative B.D1	Alternative B.D1
	source		Wind Energy Requirements Act	Wind Energy Requirements Act	Energy Strategy 2040 BB
	distribution key		2.2% Brandenburg by 2032	1.6% Brandenburg by 2032	2.0% Brandenburg by 2030
	Distribution key for HF		6842 km2 * 0.022 = 150.524 km2	6842 km2 * 0.02 = 136.84 km2	6842 km2 * 0.02 = 136.84 km2
No.	scenarios
1	Status Quo Maximum without bird hotspots
	Total area of planning space		6842	6842	6842
	Area requirement bird hotspots approach RK 1 Top 5 (km2)		426.14	426.14	426.14
	Space requirement taboo criteria (km2)
	Area potential for wind systems (km2)		99.54	99.54	99.54
	Area potential WT (%)		1.45484	1.45484	1.45484
	Installable power (MW)		2879.6	2879.6	2879.6
	attachment count		583.304	583.304	583.304
	Balance of energy targets and available space		-0.745162	-0.345162	-0.545162
2	WT in bird hotspots
	A) X % of the area in bird hotspots covered with wind systems (km2)		0	0	0
	Area balance in km2 (status quo maximum) (km2)		98.28	98.28	98.28
	Area balance in %		1.43642	1.43642	1.43642
	Power balance in MW		2879.6	2879.6	2879.6
	number of systems		575.921	575.921	575.921
	Balance of energy targets and available space		-0.763578	-0.363578	-0.563578
	B) X% of the area in the bird hotspots built on with wind systems		21.307	21.307	21.307
	Area balance in km2 (status quo maximum)		119.587	119.587	119.587
	Area balance in %		1.74784	1.74784	1.74784
	Power balance in MW		3503.9	3503.9	3503.9
	number of systems		700.78	700.78	700.78
	Balance of energy targets and available space		-0.452163	-0.0521631	-0.252163
	C) X% of the area in the bird hotspots built on with wind systems		42.614	42.614	42.614
	Area balance in km2 (status quo maximum)		140.894	140.894	140.894
	Area balance in %		2.05925	2.05925	2.05925
	Power balance in MW		4128.19	4128.19	4128.19
	number of systems		825.639	825.639	825.639
	Balance of energy targets and available space		-0.140748	0.259252	0.0592517
	D) 0.31% of the area in the bird hotspots built on with wind systems		1.02274	1.02274	1.02274
	Area balance in km2 (status quo maximum)		99.3027	99.3027	99.3027
	Area balance in %		1.45137	1.45137	1.45137
	Power balance in MW		2909.57	2909.57	2909.57
	number of systems		581.914	581.914	581.914
	Balance of energy targets and available space		-0.74863	-0.34863	-0.54863
3	Repowering in bird hotspots
	NO
4	Dismantling of existing systems in bird hotspots
	NO
5	Expansion of PV to replace missing wind turbine targets after the area potential has been reached
	A) X % of the area in bird hotspots covered with wind systems (km2)
	Area potential WT that can be reached (km2)		98.28	98.28	98.28
	Capacity potential of wind systems (MW) associated with the area potential achieved		2879.6	2879.6	2879.6
	Area balance in % WT		1.43642	1.43642	1.43642
	Area still to be identified (%) in balance with energy targets		-0.763578	-0.363578	-0.563578
	Area still to be identified (%) in balance with energy targets positive value		0.763578	0.363578	0.563578
	Area yet to be identified (km2) in balance with energy targets		52.244	24.876	38.56
	Output to be achieved with wind systems on the area still required (MW)		1530.75	728.867	1129.81
	The power to be achieved with PV conveRKed into the area requirement (km2)		15.4621	7.36229	11.4122
	Area balance in % for PV		0.225988	0.107604	0.166796
	Balance of available space for PV and space required to achieve wind turbine targets with PV		0.336048	0.454432	0.39524
	Space requirement for PV expansion targets (km2)		0.256835	0.317875	0.229864
	Balance of space requirements for PV expansion targets and increase in wind deficit with PV (km2)		0.0308468	0.210271	0.0630674
	B) X% of the area in the bird hotspots built on with wind systems
	Area potential WT that can be reached (km2)		119.587	119.587	119.587
	Capacity potential of wind systems (MW) associated with the area potential achieved		3503.9	3503.9	3503.9
	Area balance in % WT		1.74784	1.74784	1.74784
	Area still to be identified (%) in balance with energy targets		-0.452163	-0.0521631	-0.252163
	Area still to be identified (%) in balance with energy targets positive value		0.452163	0.0521631	0.252163
	Area yet to be identified (km2) in balance with energy targets		30.937	3.569	17.253
	Output to be achieved with wind systems on the area still required (MW)		906.454	104.572	505.513
	The power to be achieved with PV conveRKed into the area requirement (km2)		9.1561	1.05628	5.10619
	Area balance in % for PV		0.133822	0.0154382	0.0746301
	Balance of available space for PV and space required to achieve wind turbine targets with PV		0.428215	0.546598	0.487407
	Space requirement for PV expansion targets (km2)		0.256835	0.317875	0.229864
	Balance of space requirements for PV expansion targets and increase in wind deficit with PV (km2)		0.123013	0.302437	0.155234
6	Status Quo PV on EEG base areas with bird hotspots
	A) PV are expanded according to the EEG area setting and thus 100% in bird hotspots
	Output potential on EEG base areas (MWp)		3807	3807	3807
	Area potential PV EEG base areas (km2)		38.4545	38.4545	38.4545
	Area balance in %		0.562037	0.562037	0.562037
	Balance of energy targets and available space		0.256835	0.317875	0.229864
7	PV in bird hotspots in the energy mix
	A) X% of the possible output of PV in bird hotspots
	Additional area potential (km2)		0	0	0
	Additional power potential (MW)		0	0	0
	Area balance in km2 (status quo maximum) (km2)		28.5662	28.5662	28.5662
	Area balance in %		0.417512	0.417512	0.417512
	Power balance in MW		2828.05	2828.05	2828.05
	Balance of energy targets and available space		0.11231	0.173351	0.0853389
	B) X% of the possible output of PV in bird hotspots
	Additional area potential (km2)		0.988838	0.988838	0.988838
	Additional power potential (MWp)		97.895	97.895	97.895
	Area balance in km2 (status quo maximum) (km2)		29.555	29.555	29.555
	Area balance in %		0.431964	0.431964	0.431964
	Output balance in MWp		2925.95	2925.95	2925.95
	Balance of energy targets and available space		0.126763	0.187803	0.0997914
	C) X% of the possible output of PV in bird hotspots
	Additional area potential (km2)		1.97768	1.97768	1.97768
	Additional power potential (MWp)		195.79	195.79	195.79
	Area balance in km2 (status quo maximum) (km2)		30.5438	30.5438	30.5438
	Area balance in %		0.446417	0.446417	0.446417
	Output balance in MWp		3023.84	3023.84	3023.84
	Balance of energy targets and available space		0.141215	0.202256	0.114244
8	Vertical PV in bird hotspots
	A) X% of the possible output of veRKical PV in bird hotspots
	Additional area potential (km2)		1.3985	1.3985	1.3985
	Additional power potential (MW)		48.9475	48.9475	48.9475
	Area balance in km2 (status quo maximum) (km2)		82.1999	82.1999	82.1999
	Area balance in %		1.2014	1.2014	1.2014
	Power balance in MW		2877	2877	2877
	Balance of energy targets and available space		0.8962	0.957241	0.869229
	B) X % of the possible output of veRKical PV in bird hotspots
	Additional area potential (km2)		2.797	2.797	2.797
	Additional power potential (MW)		97.895	97.895	97.895
	Area balance in km2 (status quo maximum) (km2)		83.5984	83.5984	83.5984
	Area balance in %		1.22184	1.22184	1.22184
	Power balance in MW		2925.95	2925.95	2925.95
	Balance of energy targets and available space		0.91664	0.977681	0.889669
	C) X % of possible output of veRKical PV in bird hotspots
	Additional area potential (km2)		5.594	5.594	5.594
	Additional power potential (MW)		195.79	195.79	195.79
	Area balance in km2 (status quo maximum) (km2)		86.3954	86.3954	86.3954
	Area balance in %		1.26272	1.26272	1.26272
	Power balance in MW		3023.84	3023.84	3023.84
	Balance of energy targets and available space		0.95752	1.01856	0.930549
9	PV and WT together in bird hotspots
	A) X% of the possible output of PV in bird hotspots and 5% of the area built up with wind systems (sub-scenarios B)
	Additional area potential (km2)		22.2958	22.2958	22.2958
	Additional power potential (MW)
	Area balance in km2 (status quo maximum) (km2)		170.449	170.449	170.449
	Area balance in %		2.49122	2.49122	2.49122
	Power balance in MW
	Balance of energy targets and available space		-0.0139856	0.447055	0.159043
	bird hotspots and efficient locations for wind systems
10	A) X % of the area of WTs in bird hotspots if the wind speed is >5.5 m/sec
	Additional potential in bird hotspots on efficient sites (km2)		172.69	172.69	172.69
	Additional area potential (km2)		17.269	17.269	17.269
	Additional power potential (MW)		505.982	505.982	505.982
	Area balance in km2 (status quo maximum) (km2)		115.549	115.549	115.549
	Area balance in %		1.68882	1.68882	1.68882
	Power balance in MW		3385.59	3385.59	3385.59
	number of systems		677.117	677.117	677.117
	Balance of energy targets and available space		-0.511181	-0.111181	-0.311181
	B) X % of the area of WTs in bird hotspots if the wind speed is >5.5 m/s
	Additional potential in bird hotspots on efficient sites (km2)		172.69	172.69	172.69
	Additional area potential (km2)		8.6345	8.6345	8.6345
	Additional power potential (MW)		252.991	252.991	252.991
	Area balance in km2 (status quo maximum) (km2)		106.915	106.915	106.915
	Area balance in %		1.56262	1.56262	1.56262
	Power balance in MW		3132.59	3132.59	3132.59
	number of systems		626.519	626.519	626.519
	Balance of energy targets and available space		-0.637379	-0.237379	-0.437379
11	bird hotspots and higher power requirements
	A) Wind systems in bird hotspots if they are installed in a 1 km strip with a BImSch buffer of 800 m
	Additional potential in bird hotspots on efficient sites (km2)		211	211	211
	Additional area potential (km2)
	Additional power potential (MW)
	Area balance in km2 (status quo maximum) (km2)		309.28	309.28	309.28
	Area balance in %		4.52032	4.52032	4.52032
	Power balance in MW		132.445	132.445	132.445
	number of systems		26.489	26.489	26.489
	Balance of energy targets and available space		2.32032	2.72032	2.52032
12	bird hotspots and network convenience
	A) Wind systems in bird hotspots if bird hotspots <5 km at 110 kV substation
	Additional potential in bird hotspots on sites that serve the grid (km2)		0.276	0.276	0.276
	Additional area potential (km2)
	Additional power potential (MW)		8.0868	8.0868	8.0868
	Area balance in km2 (status quo maximum) (km2)		98.556	98.556	98.556
	Area balance in %		1.44046	1.44046	1.44046
	Power balance in MW		2887.69	2887.69	2887.69
	number of systems		577.538	577.538	577.538
	Balance of energy targets and available space		-0.759544	-0.359544	-0.559544
13	bird hotspots and without species-specific buffers under species protection law
	Total area of planning space
	Area requirement bird hotspots approach RK 1 (km2)		6842	426.14	426.14
	Space requirement taboo criteria (km2)		426.14	0	0
	Area potential for wind systems (km2)		234	234	234
	Area potential WT (%)		3.42005	3.42005	3.42005
	Installable power (MW)		6856.2	6856.2	6856.2
	attachment count		1371.24	1371.24	1371.24
	Balance of energy targets and available space		1.22005	1.62005	1.42005
14	bird hotspots and settlement distances
	A) Settlement distances according to BImSchG (800 m) and exclusion of bird hotspots
	Area potential for wind systems without species-specific buffers (km2)		287	287	287
	species buffer correction factor according to regional plan 3.0 HF		0.58	0.58	0.58
	Conclusion species buffer-free area		0.42	0.42	0.42
	Area potential for wind systems with species buffer correction factor (km2)		120.54	120.54	120.54
	Area potential wind systems with species buffer correction factor (%)		1.76177	1.76177	1.76177
	Installable power (MW)		3531.82	3531.82	3531.82
	attachment count		706.364	706.364	706.364
	Balance of energy targets and available space		-0.438234	-0.0382344	-0.238234
15	bird hotspots and wind systems in the forest
	B) X% of the forest area (mixed forest) with wind systems and exclusion of bird hotspots
	Additional area potential in the forest (km2)		62.9436	62.9436	62.9436
	Additional power potential (MW)		1844.25	1844.25	1844.25
	Area balance in km2 (status quo maximum) (km2)		161.224	161.224	161.224
	Area balance in %		2.35638	2.35638	2.35638
	Power balance in MW		4723.85	4723.85	4723.85
	number of systems		944.77	944.77	944.77
	Balance of energy targets and available space		0.156381	0.556381	0.356381
	C) X% of the forest area (mixed forest) with wind systems and exclusion of bird hotspots
	Additional area potential in the forest (km2)		31.4718	31.4718	31.4718
	Additional power potential (MW)		922.124	922.124	922.124
	Area balance in km2 (status quo maximum) (km2)		129.752	129.752	129.752
	Area balance in %		1.8964	1.8964	1.8964
	Power balance in MW		3801.73	3801.73	3801.73
	number of systems		760.346	760.346	760.346
	Balance of energy targets and available space		-0.303598	0.0964016	-0.103598
16	bird hotspots and landscape protection areas
	A) X% wind systems in landscape protection areas and exclusion of bird hotspots
	Additional area potential in the forest (km2)		93.0942	93.0942	93.0942
	Additional power potential (MW)		2727.66	2727.66	2727.66
	Area balance in km2 (status quo maximum) (km2)		191.374	191.374	191.374
	Area balance in %		2.79705	2.79705	2.79705
	Power balance in MW		5607.26	5607.26	5607.26
	number of systems		1121.45	1121.45	1121.45
	Balance of energy targets and available space		0.597051	0.997051	0.797051
	B) X% wind systems in landscape protection areas and exclusion of bird hotspots
	Additional area potential in the forest (km2)		31.0314	31.0314	31.0314
	Additional power potential (MW)		909.22	909.22	909.22
	Area balance in km2 (status quo maximum) (km2)		129.311	129.311	129.311
	Area balance in %		1.88996	1.88996	1.88996
	Power balance in MW		3788.82	3788.82	3788.82
	number of systems		757.765	757.765	757.765
	Balance of energy targets and available space		-0.310035	0.0899649	-0.110035
17	Status Quo Agri PV with bird hotspots
	A) Agri PV are expanded on agricultural land (number of fields <23) and thus 100% in bird hotspots
	Output potential on agricultural land (MWp)		4969	4969	4969
	Area potential Agri PV (km2)		124.225	124.225	124.225
	Area balance in %		1.81562	1.81562	1.81562
	Balance of energy targets and available space		1.51042	1.57146	1.48345
18	A) X% of the possible output of PV in bird hotspots
	Additional area potential (km2)		0	0	0
	Additional power potential (MW)		0	0	0
	Area balance in km2 (status quo maximum) (km2)		92.2815	92.2815	92.2815
	Area balance in %		1.34875	1.34875	1.34875
	Power balance in MW		3691.26	3691.26	3691.26
	Balance of energy targets and available space		1.04355	1.10459	1.01658
	B) X% of the possible output of PV in bird hotspots
	Additional area potential (km2)		3.19435	3.19435	3.19435
	Additional power potential (MWp)		127.774	127.774	127.774
	Area balance in km2 (status quo maximum) (km2)		95.4759	95.4759	95.4759
	Area balance in %		1.39544	1.39544	1.39544
	Output balance in MWp		3819.03	3819.03	3819.03
	Balance of energy targets and available space		1.09024	1.15128	1.06326
	C) X% of the possible output of PV in bird hotspots
	Additional area potential (km2)		6.3887	6.3887	6.3887
	Additional power potential (MWp)		255.548	255.548	255.548
	Area balance in km2 (status quo maximum) (km2)		98.6702	98.6702	98.6702
	Area balance in %		1.44213	1.44213	1.44213
	Output balance in MWp		3946.81	3946.81	3946.81
	Balance of energy targets and available space		1.09024	1.15128	1.06326
19	bird hotspots and nature park
	A) X % wind systems in nature park and exclusion of bird hotspots
	Additional area potential in nature parks (km2)		89.6968	89.6968	89.6968
	Additional power potential (MW)		2628.12	2628.12	2628.12
	Area balance in km2 (status quo maximum) (km2)		89.6968	89.6968	89.6968
	Area balance in %		1.31097	1.31097	1.31097
	Power balance in MW		2628.12	2628.12	2628.12
	number of systems		525.623	525.623	525.623
	Balance of energy targets and available space		-0.889027	-0.489027	-0.689027
	B) X % wind systems in nature park and exclusion of bird hotspots
	Additional area potential in nature parks (km2)		44.8484	44.8484	44.8484
	Additional power potential (MW)		1314.06	1314.06	1314.06
	Area balance in km2 (status quo maximum) (km2)		44.8484	44.8484	44.8484
	Area balance in %		0.655487	0.655487	0.655487
	Power balance in MW		1314.06	1314.06	1314.06
	number of systems		262.812	262.812	262.812
	Balance of energy targets and available space		-1.54451	-1.14451	-1.34451
20	bird hotspots and open space
	A) X % wind systems in open space and exclusion of bird hotspots
	Additional area potential in nature parks (km2)		73.4352	73.4352	73.4352
	Additional power potential (MW)		2151.65	2151.65	2151.65
	Area balance in km2 (status quo maximum) (km2)		73.4352	73.4352	73.4352
	Area balance in %		1.0733	1.0733	1.0733
	Power balance in MW		2151.65	2151.65	2151.65
	number of systems		430.33	430.33	430.33
	Balance of energy targets and available space		-1.1267	-0.7267	-0.9267
	B) X % wind systems in open space and exclusion of bird hotspots
	Additional area potential in nature parks (km2)		36.7176	36.7176	36.7176
	Additional power potential (MW)		1075.83	1075.83	1075.83
	Area balance in km2 (status quo maximum) (km2)		36.7176	36.7176	36.7176
	Area balance in %		0.53665	0.53665	0.53665
	Power balance in MW		1075.83	1075.83	1075.83
	number of systems		215.165	215.165	215.165
	Balance of energy targets and available space		-1.66335	-1.26335	-1.46335

## Sheet:  Scenarios RK Top 10
	Scenario analysis
	Status: December 2022
	input parameters
	planning region		Region Havelland-Fläming BB	Region Havelland-Fläming BB	Region Havelland-Fläming BB
	Area size (km2)		6842	6842	6842
	spatial targets WT
	Area share Brandenburg and thus Havelland-Fläming (%)		2.2	1.8	2
	target year		2032 (WaLG)	2027 (WaLG)	2030 (energy strategy BB2030)
	spatial targets PV
	Power (GW)		107.5	86
	Capacity Brandenburg with federal state distribution key 1:13 (GW)		8.26923	6.61538	9
	shareal capacity Havelland-Fläming (1:4) (GW)		2.06731	1.65385	2.25
	Area requirement in km2		20.8819	16.7055	22.7273
	Area share Havelland-Fläming (%)		0.305202	0.244161	0.332173
			EEG2023	EEG2023	Energy strategy BB 2040
	reference system
	WT area requirement (km2)		29.3	29.3	29.3
	WT plant size (MW)		5	5	5
	WT rotor diameter (m)		149	149	149
	PV EEG base areas (MWp/km2)		99	99	99
	PV Agriculture (MWp/km2)		40	40	40
	PV vertical (MWp/km2)		35	35	35
	Sub-scenario parameters
	Percentage of built-up area in bird priority zones (%)		0	0	0
	Percentage of built-up area in bird priority zones (%)		5	5	5
	Percentage of built-up area in bird priority zones (%)		10	10	10
	Percentage of built-up area in bird priority zones (%)		0.24	0.24	0.24
	Percentage of built-up area in bird priority zones (%)		0.31	0.31	0.31
	Percentage of built-up area in bird priority zones (%)		0.63	0.63	0.63
	Additional potential in bird priority zones on efficient locations (km2)		221.442	221.442	221.442
	Percentage of the area of the WT in bird priority zones if the wind speed is >5.5 m/s (%)		10	10	10
	Percentage of the area of the WT in bird priority zones if the wind speed is >5.5 m/s (%)		5	5	5
	WT in bird priority zones if they are installed in a 1 km strip with a BImSch buffer of 800 m (km2)		260	260	260
	Additional potential in bird priority zones on grid-friendly locations (km2)		37	37	37
	Percentage of the possible output of PV in bird priority zones (%)		0	0	0
	Percentage of the possible output of PV in bird priority zones (%)		10	10	10
	Percentage of the possible output of PV in bird priority zones (%)		20	20	20
	Percentage of possible output of veRKical PV in bird priority zones (%)		5	5	5
	Percentage of possible output of veRKical PV in bird priority zones (%)		10	10	10
	Percentage of possible output of veRKical PV in bird priority zones (%)		20	20	20
	Space requirement taboo criteria (km2)		0	0	0
	Area potential for WT with a settlement distance of 800 m without species buffer (km2)		283	283	283
	Area potential for WT with forest area (coniferous forest), available with negative planning of fuRKher criteria and exclusion of bird priority zones, without species buffer		234	234	234
	Area size coniferous forest without bird priority zones (RK Top 10)		1704.52	1704.52	1704.52
	Percentage of forest area with WT and exclusion of bird priority zones (%)		4	4	4
	Percentage of forest area with WT and exclusion of bird priority zones (%)		2	2	2
	Area size landscape protection areas (km2)		3010.3	3010.3	3010.3
	Area size landscape protection areas without bird priority zones (km2)		3556.45	3556.45	3556.45
	Share of area size in landscape protection areas (km2)		3	3	3
	Share of area size in landscape protection areas (km2)		1	1	1
	Output of existing systems in bird priority zones RK V2 Top 10 (MW)		4.5	4.5	4.5
	Percentage of repowering (%) (200% repowering)		2	2	2
	share of Retrofitting (%) (50% Retrofitting)		2	2	2
	Area of the nature park (km2)		2166.37	2166.37	2166.37
	Size of nature park without bird priority zones (exclusion?)(km2)		2519.99	2519.99	2519.99
	Percentage of area in nature park (km2)		2	2	2
	Percentage of area in nature park (km2)		4	4	4
	Size of open space areas (km2)		1784.96	1784.96	1784.96
	Size of open space areas without bird priority zones (exclusion) (km2)
	Share of area size in open space areas (km2)		2	2	2
	Share of area size in open space areas (km2)		4	4	4
	Size bird priority zones Approach
	Space requirement bird priority zones approach RK 1 Top 10 (km2)		543.3	543.3	543.3
1	Status quo WT exclusion planning with bird priority zonesRK Top 10
	Area potential for WT without species buffer (km2)		232	232	232
	species buffer correction factor according to regional plan 3.0 HF		0.58	0.58	0.58
	Conclusion species buffer-free area		0.42	0.42	0.42
	Area potential for WT with species buffer correction factor (km2)		97.44	97.44	97.44
	Area potential WT with species buffer correction factor (%)		1.42414	1.42414	1.42414
	Installable power (MW)		2854.99	2854.99	2854.99
	attachment count		570.998	570.998	570.998
	Review of exclusion planning without WT in white areas bird priority zones RK Top 5
	White area (km2)		234	234	234
	White area with species buffer correction factor (km2)		135.72	135.72	135.72
	White area with species buffer correction factor (%)		1.98363	1.98363	1.98363
	Status quo WT exclusion planningWITHOUT bird priority zones RK Top 10 - White space in bird priority zones
	White area in bird priority zones (km2) without species buffer correction		3.975	3.975	3.975
	Percentage of white area in the region (%)		0.058097	0.058097	0.058097
	species buffer correction factor according to regional plan 3.0 HF		0.58	0.58	0.58
	Conclusion species buffer-free area		0.42	0.42	0.42
	Area potential for WT with species buffer correction factor (km2)		1.6695	1.6695	1.6695
	Area potential WT with species buffer correction factor (%)		0.307289	0.307289	0.307289
	Installable power (MW)		48.9164	48.9164	48.9164
	attachment count		9.78327	9.78327	9.78327
	Is white space in bird priority zones a lot compared to the total white space in the region?
	White area in bird priority zones approach (km2)		1.6695
	Total white area region without bird priority zones consideration (km2)		99.54
	share of bird priority zones white area to region white area (km2)		97.8705
	share of bird priority zones white area to region white area (%)		1.67722
	How big is the perfoRKance potential that is blocked in bird priority zones?
	Blocked power potential in MW/km2		48.9164
	Blocked attachment count		9.78327
	Status quo WT exclusion planningWITHOUT all bird priority zones
	White area without bird priority zones without species buffer (km2)		237	237	237
	species buffer correction factor according to regional plan 3.0 HF		0.58	0.58	0.58
	Conclusion species buffer-free area		0.42	0.42	0.42
	Area potential for WT with species buffer correction factor (km2)		99.54	99.54	99.54
	Area potential WT with species buffer correction factor (%)		1.45484	1.45484	1.45484
	Installable power (MW)		2916.52	2916.52	2916.52
	attachment count		583.304	583.304	583.304
	How much more can be built into the forest?
	Coniferous forest in white areas depending on the bird priority zones approach (km2)		158	158	158
	Coniferous forest in the region with bird priority zones exclusion (km2)		1704.52	1704.52	1704.52
	Remaining coniferous forest (km2)		1546.52	1546.52	1546.52
	Share of coniferous forest in white area of the total coniferous forest (%)		9.26948	9.26948	9.26948
	Status quo EEG base areas PV bird priority zones RK TOP 10
	Output potential on EEG base areas (MWp)		3807	3808	3809
	Area potential PV EEG base areas (km2)		38.4545	38.4646	38.4747
	Assumed PV expansion potential in bird priority zones RK V1 (grid) (MWp)		1278.07	1279.07	1280.07
	Assumed PV expansion potential in bird priority zones RK V1 (grid) (km2)		12.9098	12.9199	12.93
	Remaining PV expansion potential outside of bird priority zones (grid) (MWp)		2528.93	2528.93	2528.93
	Remaining PV expansion potential outside of bird priority zones (grid) (km2)		25.5447	25.5447	25.5447
	Status Quo Agri PV bird priority zones RK TOP 5
	PerfoRKance potential on agricultural land (number of fields > 23) (MWp)		4969	4969	4969
	Area potential PV EEG base areas (km2)		124.225	124.225	124.225
	Assumed PV expansion potential in bird priority zones RK V1 (grid) (MWp)		1668.16	1668.16	1668.16
	Assumed PV expansion potential in bird priority zones RK V1 (grid) (km2)		41.7041	41.7041	41.7041
	Remaining PV expansion potential outside of bird priority zones (grid) (MWp)		3300.84	3300.84	3300.84
	Remaining PV expansion potential outside of bird priority zones (grid) (km2)		82.5209	82.5209	82.5209
	Scenario Outcomes
	energy target dimensions		Alternate A.D1	Alternative B.D1	Alternative B.D1
	source		Wind Energy Requirements Act	Wind Energy Requirements Act	Energy Strategy 2040 BB
	distribution key		2.2% Brandenburg by 2032	1.8% Brandenburg by 2032	2.0% Brandenburg by 2030
	Distribution key for HF		6842 km2 * 0.022 = 150.524 km2	6842 km2 * 0.02 = 136.84 km2	6842 km2 * 0.02 = 136.84 km2
No.	scenarios
1	Status Quo Maximumwithout bird priority zones
	Total area of planning space		6842	6842	6842
	Space requirement bird priority zones approach RK 1 Top 5 (km2)		543.3	543.3	543.3
	Space requirement taboo criteria (km2)
	Area potential for WT (km2)		99.54	99.54	99.54
	Area potential WT (%)		1.45484	1.45484	1.45484
	Installable power (MW)		2916.52	2916.52	2916.52
	attachment count		583.304	583.304	583.304
	Balance of energy targets and available space		-0.745162	-0.345162	-0.545162
2	WT in bird priority zones
	A) X% of the area in bird priority zones covered with WT (km2)		0	0	0
	Area balance in km2 (status quo maximum) (km2)		97.44	97.44	97.44
	Area balance in %		1.42414	1.42414	1.42414
	Power balance in MW		2854.99	2854.99	2854.99
	number of system		570.998	570.998	570.998
	Balance of energy targets and available space		-0.775855	-0.375855	-0.575855
	B) X% of the area in bird priority zones covered with WT (km2)		27.165	27.165	27.165
	Area balance in km2 (status quo maximum)		124.605	124.605	124.605
	Area balance in %		1.82118	1.82118	1.82118
	Power balance in MW		3650.93	3650.93	3650.93
	number of system		730.185	730.185	730.185
	Balance of energy targets and available space		-0.378822	0.021178	-0.178822
	C) X% of the area in bird priority zones covered with WT (km2)		54.33	54.33	54.33
	Area balance in km2 (status quo maximum)		151.77	151.77	151.77
	Area balance in %		2.21821	2.21821	2.21821
	Power balance in MW		4446.86	4446.86	4446.86
	number of system		889.372	889.372	889.372
	Balance of energy targets and available space		0.018211	0.418211	0.218211
	D) 0.69% of the area in the bird priority zones built on with WT		1.68423	1.68423	1.68423
	Area balance in km2 (status quo maximum)		99.1242	99.1242	99.1242
	Area balance in %		1.44876	1.44876	1.44876
	Power balance in MW		2904.34	2904.34	2904.34
	number of system		580.868	580.868	580.868
	Balance of energy targets and available space		-0.751239	-0.351239	-0.551239
3	Repowering in bird priority zones
	A) 100% repowering (1:1) based on perfoRKance
	Output of existing systems in bird priority zones in MW		4.5	4.5	4.5
	Space requirements for existing systems in bird priority zones in km2		0.153584	0.153584	0.153584
	Power balance in MW (status quo maximum)		2921.02	2921.02	2921.02
	attachment count		584.204	584.204	584.204
	Area balance in km2 (status quo maximum)		99.6936	99.6936	99.6936
	Area balance in %		1.45708	1.45708	1.45708
	Balance of energy targets and available space		-0.742918	-0.342918	-0.542918
	B) 200% repowering (2:1) (double the power) in relation to the power
	Output of existing systems in bird priority zones in MW		9	9	9
	Space requirements for existing systems in bird priority zones in km2		0.307167	0.307167	0.307167
	Power balance in MW (status quo maximum)		2925.52	2925.52	2925.52
	attachment count		585.104	585.104	585.104
	Area balance in km2 (status quo maximum)		99.8472	99.8472	99.8472
	Area balance in %		1.45933	1.45933	1.45933
	Balance of energy targets and available space		-0.740673	-0.340673	-0.540673
4	Retrofitting of existing systems in bird priority zones
	A) 100% demolition (i.e. no existing systems in bird priority zones) (existing systems are deducted from the expansion potential, ie additional expansion would have to be carried out)
	Output of existing systems in bird priority zones in MW		4.5	4.5	4.5
	Space requirements for existing systems in bird priority zones in km2		0.153584	0.153584	0.153584
	Power balance in MW (status quo maximum)		2912.02	2912.02	2912.02
	attachment count		582.404	582.404	582.404
	Area balance in km2 (status quo maximum)		99.3864	99.3864	99.3864
	Area balance in %		1.45259	1.45259	1.45259
	Balance of energy targets and available space		-0.747407	-0.347407	-0.547407
5	Expansion of PV to replace missing wind turbine targets after the area potential has been reached
	A) X% of the area in bird priority zones covered with WT (km2)
	Area potential WT that can be reached (km2)		97.44	97.44	97.44
	Capacity potential of WT (MW) associated with the area potential achieved		2854.99	2854.99	2854.99
	Area balance in % WT		1.42414	1.42414	1.42414
	Area still to be identified (%) in balance with energy targets		-0.775855	-0.375855	-0.575855
	Area still to be identified (%) in balance with energy targets positive value		0.775855	0.375855	0.575855
	Area yet to be identified (km2) in balance with energy targets		53.084	25.716	39.4
	Output to be achieved with WT on the area still required (MW)		1555.36	753.479	1154.42
	With PV, the power to be achieved conveRKed into the area requirement (km2)		15.7107	7.6109	11.6608
	Area balance in % for PV		0.229622	0.111238	0.17043
	Balance of area availability PV and necessary area requirement to achieve wind turbine targets with PV (%?)		0.332415	0.450799	0.391607
	Space requirement for PV expansion targets (km2)		0.256835	0.317875	0.229864
	Balance of space requirements for PV expansion targets and increase in wind deficit with PV (km2)		0.0272132	0.206637	0.0594339
	A) X% of the area in bird priority zones covered with WT (km2)
	Area potential WT that can be reached (km2)		124.605	124.605	124.605
	Capacity potential of WT (MW) associated with the area potential achieved		3650.93	3650.93	3650.93
	Area balance in % WT		1.82118	1.82118	1.82118
	Area still to be identified (%) in balance with energy targets		-0.378822	0.021178	-0.178822
	Area still to be identified (%) in balance with energy targets positive value		0.378822	-0.021178	0.178822
	Area yet to be identified (km2) in balance with energy targets		25.919	-1.449	12.235
	Output to be achieved with WT on the area still required (MW)		759.427	-42.4557	358.486
	With PV, the power to be achieved conveRKed into the area requirement (km2)		7.67098	-0.428845	3.62107
	Area balance in % for PV		0.112116	-0.00626784	0.0529241
	Balance of area availability PV and necessary area requirement to achieve wind turbine targets with PV		0.449921	0.568304	0.509113
	Space requirement for PV expansion targets (km2)		0.256835	0.317875	0.229864
	Balance of space requirements for PV expansion targets and increase in wind deficit with PV (km2)		0.144719	0.324143	0.17694
6	Status quo PV on EEG base areas with bird priority zones
	A) PV are expanded according to the EEG area setting and 100% in bird priority zones
	Output potential on EEG base areas (MWp)		3807	3807	3807
	Area potential PV EEG base areas (km2)		38.4545	38.4545	38.4545
	Area balance in %		0.562037	0.562037	0.562037
	Balance of energy targets and available space		0.256835	0.317875	0.229864
7	PV in bird priority zones in the energy mix
	A) X% of the possible output of PV in bird priority zones
	Additional area potential (km2)		0	0	0
	Additional power potential (MW)		0	0	0
	Area balance in km2 (status quo maximum) (km2)		25.5447	25.5447	25.5447
	Area balance in %		0.373352	0.373352	0.373352
	Power balance in MW		2528.93	2528.93	2528.93
	Balance of energy targets and available space		0.0681504	0.129191	0.0411791
	B) X% of the possible power of PV in bird priority zones
	Additional area potential (km2)		1.29098	1.29199	1.293
	Additional power potential (MWp)		127.807	127.907	128.007
	Area balance in km2 (status quo maximum) (km2)		26.8357	26.8367	26.8377
	Area balance in %		0.392221	0.392235	0.39225
	Output balance in MWp		2656.74	2656.84	2656.94
	Balance of energy targets and available space		0.0870189	0.148074	0.0600771
	C) X% of possible power of PV in bird priority zones
	Additional area potential (km2)		2.58196	2.58398	2.586
	Additional power potential (MWp)		255.614	255.814	256.014
	Area balance in km2 (status quo maximum) (km2)		28.1267	28.1287	28.1307
	Area balance in %		0.411089	0.411118	0.411148
	Output balance in MWp		2784.54	2784.74	2784.94
	Balance of energy targets and available space		0.105887	0.166957	0.0789751
8	VeRKical PV in bird priority zones
	A) X% of the possible power of veRKical PV in bird priority zones
	Additional area potential (km2)		1.82581	1.82724	1.82867
	Additional power potential (MW)		63.9035	63.9535	64.0035
	Area balance in km2 (status quo maximum) (km2)		74.081	74.0824	74.0838
	Area balance in %		1.08274	1.08276	1.08278
	Power balance in MW		2592.83	2592.88	2592.93
	Balance of energy targets and available space		0.777537	0.838598	0.750607
	B) X% of the possible power of veRKical PV in bird priority zones
	Additional area potential (km2)		3.65163	3.65449	3.65734
	Additional power potential (MW)		127.807	127.907	128.007
	Area balance in km2 (status quo maximum) (km2)		75.9068	75.9096	75.9125
	Area balance in %		1.10942	1.10947	1.10951
	Power balance in MW		140.717	140.827	140.937
	Balance of energy targets and available space		0.804222	0.865304	0.777334
	C) X% of the possible power of veRKical PV in bird priority zones
	Additional area potential (km2)		7.30326	7.30897	7.31469
	Additional power potential (MW)		255.614	255.814	256.014
	Area balance in km2 (status quo maximum) (km2)		79.5584	79.5641	79.5698
	Area balance in %		1.16279	1.16288	1.16296
	Power balance in MW		2784.54	2784.74	2784.94
	Balance of energy targets and available space		0.857593	0.918717	0.830789
9	PV and WT together in a bird priority zones
	A) X% of the possible output of PV in bird priority zones and 5% of the area built up with WT (sub-scenarios B)
	Additional area potential (km2)		28.456	28.457	28.458
	Additional power potential (MW)
	Area balance in km2 (status quo maximum) (km2)		179.897	179.899	179.901
	Area balance in %		2.6293	2.62933	2.62936
	Power balance in MW
	Balance of energy targets and available space		0.124098	0.585168	0.297186
	bird priority zones and efficient locations for WT
10	A) X% of the area of the WT in bird priority zones if the wind speed is >5.5 m/sec
	Additional potential in bird priority zones on efficient locations (km2)		221.442	221.442	221.442
	Additional area potential (km2)		22.1442	22.1442	22.1442
	Additional power potential (MW)		648.825	648.825	648.825
	Area balance in km2 (status quo maximum) (km2)		119.584	119.584	119.584
	Area balance in %		1.7478	1.7478	1.7478
	Power balance in MW		3503.82	3503.82	3503.82
	number of system		700.763	700.763	700.763
	Balance of energy targets and available space		-0.452204	-0.052204	-0.252204
	B) X% of the area of the WT in bird priority zones if the wind speed is >5.5 m/s
	Additional potential in bird priority zones on efficient locations (km2)		221.442	221.442	221.442
	Additional area potential (km2)		11.0721	11.0721	11.0721
	Additional power potential (MW)		324.413	324.413	324.413
	Area balance in km2 (status quo maximum) (km2)		108.512	108.512	108.512
	Area balance in %		1.58597	1.58597	1.58597
	Power balance in MW		3179.4	3179.4	3179.4
	number of system		635.881	635.881	635.881
	Balance of energy targets and available space		-0.61403	-0.21403	-0.41403
11	bird priority zones and higher power requirements
	A) WT in bird priority zones if they are installed in a 1 km strip with a BImSch buffer of 800 m
	Additional potential in bird priority zones on efficient locations (km2)		260	260	260
	Additional area potential (km2)
	Additional power potential (MW)
	Area balance in km2 (status quo maximum) (km2)		357.44	357.44	357.44
	Area balance in %		5.2242	5.2242	5.2242
	Power balance in MW		153.069	153.069	153.069
	number of system		30.6138	30.6138	30.6138
	Balance of energy targets and available space		3.0242	3.4242	3.2242
12	bird priority zones and network convenience
	A) WT in bird priority zones, if bird priority zones <5 km at 110 kV substation
	Additional potential in bird priority zones on grid-friendly locations (km2)		37	37	37
	Additional area potential (km2)
	Additional power potential (MW)		1084.1	1084.1	1084.1
	Area balance in km2 (status quo maximum) (km2)		134.44	134.44	134.44
	Area balance in %		1.96492	1.96492	1.96492
	Power balance in MW		3939.09	3939.09	3939.09
	number of system		787.818	787.818	787.818
	Balance of energy targets and available space		-0.235077	0.164923	-0.0350775
13	bird priority zones and without species buffer under species protection law
	Total area of planning space
	Space requirement bird priority zones approach RK 1 (km2)		6842	543.3	543.3
	Space requirement taboo criteria (km2)		543.3	0	0
	Area potential for WT (km2)		232	232	232
	Area potential WT (%)		3.39082	3.39082	3.39082
	Installable power (MW)		6797.6	6797.6	6797.6
	attachment count		1359.52	1359.52	1359.52
	Balance of energy targets and available space		1.19082	1.59082	1.39082
14	bird priority zones and settlement distances
	A) Settlement distances according to BImSchG (800 m) and exclusion of bird priority zones
	Area potential for WT without species buffer (km2)		283	283	283
	species buffer correction factor according to regional plan 3.0 HF		0.58	0.58	0.58
	Conclusion species buffer-free area		0.42	0.42	0.42
	Area potential for WT with species buffer correction factor (km2)		118.86	118.86	118.86
	Area potential WT with species buffer correction factor (%)		1.73721	1.73721	1.73721
	Installable power (MW)		3482.6	3482.6	3482.6
	attachment count		696.52	696.52	696.52
	Balance of energy targets and available space		-0.462789	-0.0627887	-0.262789
15	bird priority zones and wind turbine in the forest
	B) X% of the forest area (mixed forest) with WT and the exclusion of bird priority zones
	Additional area potential in the forest (km2)		61.8608	61.8608	61.8608
	Additional power potential (MW)		1812.52	1812.52	1812.52
	Area balance in km2 (status quo maximum) (km2)		159.301	159.301	159.301
	Area balance in %		2.32828	2.32828	2.32828
	Power balance in MW		4667.51	4667.51	4667.51
	number of system		933.502	933.502	933.502
	Balance of energy targets and available space		0.128278	0.528278	0.328278
	C) X% of the forest area (mixed forest) with WT and the exclusion of bird priority zones
	Additional area potential in the forest (km2)		30.9304	30.9304	30.9304
	Additional power potential (MW)		906.26	906.26	906.26
	Area balance in km2 (status quo maximum) (km2)		128.37	128.37	128.37
	Area balance in %		1.87621	1.87621	1.87621
	Power balance in MW		3761.25	3761.25	3761.25
	number of system		752.25	752.25	752.25
	Balance of energy targets and available space		-0.323789	0.0762113	-0.123789
16	bird priority zones and landscape protection areas
	A) X% WT in landscape protection areas and exclusion of bird priority zones
	Additional area potential in the forest (km2)		90.3091	90.3091	90.3091
	Additional power potential (MW)		2646.06	2646.06	2646.06
	Area balance in km2 (status quo maximum) (km2)		187.749	187.749	187.749
	Area balance in %		2.74407	2.74407	2.74407
	Power balance in MW		5501.05	5501.05	5501.05
	number of system		1100.21	1100.21	1100.21
	Balance of energy targets and available space		0.544068	0.944068	0.744068
	B) X% WT in landscape protection areas and exclusion of bird priority zones
	Additional area potential in the forest (km2)		30.103	30.103	30.103
	Additional power potential (MW)		882.019	882.019	882.019
	Area balance in km2 (status quo maximum) (km2)		127.543	127.543	127.543
	Area balance in %		1.86412	1.86412	1.86412
	Power balance in MW		3737.01	3737.01	3737.01
	number of system		747.402	747.402	747.402
	Balance of energy targets and available space		-0.335881	0.0641194	-0.135881
17	Status Quo Agri PV with bird priority zones
	A) Agri PV are expanded on agricultural land (number of fields <23) and thus 100% in bird priority zones
	Output potential on agricultural land (MWp)		4969	4969	4969
	Area potential Agri PV (km2)		124.225	124.225	124.225
	Area balance in %		1.81562	1.81562	1.81562
	Balance of energy targets and available space		1.51042	1.57146	1.48345
18	A) X% of the possible output of PV in bird priority zones
	Additional area potential (km2)		0	0	0
	Additional power potential (MW)		0	0	0
	Area balance in km2 (status quo maximum) (km2)		82.5209	82.5209	82.5209
	Area balance in %		1.20609	1.20609	1.20609
	Power balance in MW		3300.84	3300.84	3300.84
	Balance of energy targets and available space		0.900892	0.961932	0.87392
	B) X% of the possible power of PV in bird priority zones
	Additional area potential (km2)		3.19517	3.19767	3.20018
	Additional power potential (MWp)		127.807	127.907	128.007
	Area balance in km2 (status quo maximum) (km2)		85.7161	85.7186	85.7211
	Area balance in %		1.25279	1.25283	1.25287
	Output balance in MWp		3428.64	3428.74	3428.84
	Balance of energy targets and available space		0.947591	1.00867	0.920693
	C) X% of possible power of PV in bird priority zones
	Additional area potential (km2)		6.39035	6.39535	6.40035
	Additional power potential (MWp)		255.614	255.814	256.014
	Area balance in km2 (status quo maximum) (km2)		88.9113	88.9163	88.9213
	Area balance in %		1.29949	1.29957	1.29964
	Output balance in MWp		3556.45	3556.65	3556.85
	Balance of energy targets and available space		0.99429	1.0554	0.967465
19	bird priority zones and nature park
	A) X% WT in nature park and exclusion of bird priority zones
	Additional area potential in nature parks (km2)		86.6548	86.6548	86.6548
	Additional power potential (MW)		2538.99	2538.99	2538.99
	Area balance in km2 (status quo maximum) (km2)		184.095	184.095	184.095
	Area balance in %		2.69066	2.69066	2.69066
	Power balance in MW		5393.98	5393.98	5393.98
	number of system		1078.8	1078.8	1078.8
	Balance of energy targets and available space		0.490658	0.890658	0.690658
	B) X% WT in nature park and exclusion of bird priority zones
	Additional area potential in nature parks (km2)		43.3274	43.3274	43.3274
	Additional power potential (MW)		1269.49	1269.49	1269.49
	Area balance in km2 (status quo maximum) (km2)		140.767	140.767	140.767
	Area balance in %		2.0574	2.0574	2.0574
	Power balance in MW		4124.48	4124.48	4124.48
	number of system		824.897	824.897	824.897
	Balance of energy targets and available space		-0.142599	0.257401	0.0574013
20	bird priority zones and open space
	A) X % WT in open space and exclusion of bird priority zones
	Additional area potential in nature parks (km2)		71.3984	71.3984	71.3984
	Additional power potential (MW)		2091.97	2091.97	2091.97
	Area balance in km2 (status quo maximum) (km2)		168.838	168.838	168.838
	Area balance in %		2.46768	2.46768	2.46768
	Power balance in MW		4946.97	4946.97	4946.97
	number of system		989.393	989.393	989.393
	Balance of energy targets and available space		0.267676	0.667676	0.467676
	B) X % WT in open space and exclusion of bird priority zones
	Additional area potential in nature parks (km2)		35.6992	35.6992	35.6992
	Additional power potential (MW)		1045.99	1045.99	1045.99
	Area balance in km2 (status quo maximum) (km2)		133.139	133.139	133.139
	Area balance in %		1.94591	1.94591	1.94591
	Power balance in MW		3900.98	3900.98	3900.98
	number of system		780.196	780.196	780.196
	Balance of energy targets and available space		-0.254089	0.145911	-0.0540894

## Sheet:  Scenarios OS Top 10
	Scenario analysis
	Status: December 2022
	input parameters
	planning region		Region Havelland-Fläming BB	Region Havelland-Fläming BB	Region Havelland-Fläming BB
	Area size (km2)		6842	6842	6842
	spatial targets WT
	Area share Brandenburg and thus Havelland-Fläming (%)		2.2	1.8	2
	target year		2032 (WaLG)	2027 (WaLG)	2030 (energy strategy BB2030)
	spatial targets PV
	Power (GW)		107.5	86
	Capacity Brandenburg with federal state distribution key 1:13 (GW)		8.26923	6.61538	9
	Shareal capacity Havelland-Fläming (1:4) (GW)		2.06731	1.65385	2.25
	Area requirement in km2		20.8819	16.7055	22.7273
	Area share Havelland-Fläming (%)		0.305202	0.244161	0.332173
			EEG2023	EEG2023	Energy strategy BB 2040
	reference plants
	WT area requirement (km2)		29.3	29.3	29.3
	WT plant size (MW)		5	5	5
	WT rotor diameter (m)		149	149	149
	PV EEG base areas (MWp/km2)		99	99	99
	PV Agriculture (MWp/km2)		40	40	40
	PV vertical (MWp/km2)		35	35	35
	Sub-scenario parameters
	Percentage of built-up area in bird priority zones (%)		0	0	0
	Percentage of built-up area in bird priority zones (%)		5	5	5
	Percentage of built-up area in bird priority zones (%)		10	10	10
	Percentage of built-up area in bird priority zones (%)		0.24	0.24	0.24
	Percentage of built-up area in bird priority zones (%)		0.31	0.31	0.31
	Percentage of built-up area in bird priority zones (%)		0.63	0.63	0.63
	Additional potential in bird priority zones on efficient locations (km2)		103	103	103
	Percentage of the area of the WT in bird priority zones if the wind speed is >5.5 m/s (%)		10	10	10
	Percentage of the area of the WT in bird priority zones if the wind speed is >5.5 m/s (%)		5	5	5
	WT in bird priority zones if they are installed in a 1 km strip with a BImSch buffer of 800 m (km2)		322	322	322
	Additional potential in bird priority zones on grid-friendly locations (km2)		298	298	298
	Percentage of the possible output of PV in bird priority zones (%)		0	0	0
	Percentage of the possible output of PV in bird priority zones (%)		10	10	10
	Percentage of the possible output of PV in bird priority zones (%)		20	20	20
	Percentage of possible output of veRKical PV in bird priority zones (%)		5	5	5
	Percentage of possible output of veRKical PV in bird priority zones (%)		10	10	10
	Percentage of possible output of veRKical PV in bird priority zones (%)		20	20	20
	Space requirement taboo criteria (km2)		0	0	0
	Area potential for WT with a settlement distance of 800 m without species buffers (km2)		275	275	275
	Area potential for WT with forest area (coniferous forest), available with negative planning of fuRKher criteria and exclusion of bird priority zones, without species buffers		226	226	226
	Area size coniferous forest without bird priority zones FA Top 10)		1596.85	1596.85	1596.85
	Percentage of forest area with WT and exclusion of bird priority zones (%)		4	4	4
	Percentage of forest area with WT and exclusion of bird priority zones (%)		2	2	2
	Area size LSG (km2)		2934.92	2934.92	2934.92
	Area size LSG without bird priority zones (km2)		3556.45	3556.45	3556.45
	Share of area size in LSG (km2)		3	3	3
	Share of area size in LSG (km2)		1	1	1
	Output of existing systems in bird priority zones FA Top 10 (MW)		124.85	124.85	124.85
	Percentage of repowering (%) (200% repowering)		2	2	2
	Share of dismantling (%) (50% dismantling)		2	2	2
	Area of the nature park (km2)		2277.34	2277.34	2277.34
	Size of nature park without bird priority zones (exclusion?)(km2)		2519.99	2519.99	2519.99
	Percentage of area in nature park (km2)		2	2	2
	Percentage of area in nature park (km2)		4	4	4
	Size of open space areas (km2)		1906.36	1906.36	1906.36
	Size of open space areas without bird priority zones (exclusion) (km2)
	Share of area size in open space areas (km2)		2	2	2
	Share of area size in open space areas (km2)		4	4	4
	Size bird priority zones Approach
	Space requirement bird priority zones approach FA Top 10 (km2)		714.77	714.77	714.77
1	Status quo exclusion planning WT with bird priority zones FA Top 10
	Area potential for WT without species buffers (km2)		225	225	225
	species buffer correction factor according to regional plan 3.0 HF		0.58	0.58	0.58
	Conclusion species buffer-free area		0.42	0.42	0.42
	Area potential for WT with species buffer correction factor (km2)		94.5	94.5	94.5
	Area potential WT with species buffer correction factor (%)		1.38118	1.38118	1.38118
	Installable power (MW)		2768.85	2768.85	2768.85
	attachment count		553.77	553.77	553.77
	Review of exclusion planning without WT in white areas bird priority zones RM Top 5
	White area (km2)		234	234	234
	White area with species buffer correction factor (km2)		135.72	135.72	135.72
	White area with species buffer correction factor (%)		1.98363	1.98363	1.98363
	Status quo exclusion planning WT WITHOUT bird priority zones FA Top 10
	White area in bird priority zones (km2) without species buffer correction		10.7614	10.7614	10.7614
	Percentage of white area in the region (%)		0.157284	0.157284	0.157284
	species buffer correction factor according to regional plan 3.0 HF		0.58	0.58	0.58
	Conclusion species buffer-free area		0.42	0.42	0.42
	Area potential for WT with species buffer correction factor (km2)		4.51979	4.51979	4.51979
	Area potential WT with species buffer correction factor (%)		0.632342	0.632342	0.632342
	Installable power (MW)		132.43	132.43	132.43
	attachment count		26.486	26.486	26.486
	Is white space in bird priority zones a lot compared to the total white space in the region?
	White area in bird priority zones approach (km2)		4.51979
	Total white area region without bird priority zones consideration (km2)		99.54
	Share of bird priority zones white area to region white area (km2)		95.0202
	Share of bird priority zones white area to region white area (%)		4.54068
	How big is the performance potential that is blocked in bird priority zones?
	Blocked power potential in MW/km2		132.43
	Blocked attachment count		26.486
	Status quo WT exclusion planningWITHOUT all bird priority zones
	White area without bird priority zones without species buffers (km2)		237	237	237
	species buffer correction factor according to regional plan 3.0 HF		0.58	0.58	0.58
	Conclusion species buffer-free area		0.42	0.42	0.42
	Area potential for WT with species buffer correction factor (km2)		99.54	99.54	99.54
	Area potential WT with species buffer correction factor (%)		1.45484	1.45484	1.45484
	Installable power (MW)		2916.52	2916.52	2916.52
	attachment count		583.304	583.304	583.304
	How much more can be built into the forest?
	Coniferous forest in white areas depending on the bird priority zones approach (km2)		153	153	153
	Coniferous forest in the region with bird priority zones exclusion (km2)		1596.85	1596.85	1596.85
	Remaining coniferous forest (km2)		1443.85	1443.85	1443.85
	Share of coniferous forest in white area of the total coniferous forest (%)		9.58136	9.58136	9.58136
	Status quo EEG base areas PV bird priority zones FA TOP 10
	Output potential on EEG base areas (MWp)		3807	3808	3809
	Area potential PV EEG base areas (km2)		38.4545	38.4646	38.4747
	Assumed PV expansion potential in bird priority zones RM V1 (grid) (MWp)		1414.04	1415.04	1416.04
	Assumed PV expansion potential in bird priority zones RM V1 (grid) (km2)		14.2832	14.2933	14.3034
	Remaining PV expansion potential outside of bird priority zones (grid) (MWp)		2392.96	2392.96	2392.96
	Remaining PV expansion potential outside of bird priority zones (grid) (km2)		24.1713	24.1713	24.1713
	Status Quo Agri PV bird priority zones RM TOP 5
	Performance potential on agricultural land (number of fields > 23) (MWp)		4969	4969	4969
	Area potential PV (km2)		124.225	124.225	124.225
	Assumed PV expansion potential in bird priority zones RM V1 (grid) (MWp)		1845.63	1845.63	1845.63
	Assumed PV expansion potential in bird priority zones RM V1 (grid) (km2)		46.1407	46.1407	46.1407
	Remaining PV expansion potential outside of bird priority zones (grid) (MWp)		3123.37	3123.37	3123.37
	Remaining PV expansion potential outside of bird priority zones (grid) (km2)		78.0843	78.0843	78.0843
	Scenario Outcomes
	energy target dimensions		Alternate A.D1	Alternative B.D1	Alternative B.D1
	source		Wind Energy Requirements Act	Wind Energy Requirements Act	Energy Strategy 2040 BB
	distribution key		2.2% Brandenburg by 2032	1.8% Brandenburg by 2032	2.0% Brandenburg by 2030
	Distribution key for HF		6842 km2 * 0.022 = 150.524 km2	6842 km2 * 0.02 = 136.84 km2	6842 km2 * 0.02 = 136.84 km2
No.	scenarios
1	Status Quo Maximumwithout bird priority zones
	Total area of planning space		6842	6842	6842
	Space requirement bird priority zones approach RM 1 Top 5 (km2)		714.77	714.77	714.77
	Space requirement taboo criteria (km2)
	Area potential for WT (km2)		99.54	99.54	99.54
	Area potential WT (%)		1.45484	1.45484	1.45484
	Installable power (MW)		2916.52	2916.52	2916.52
	attachment count		583.304	583.304	583.304
	Balance of energy targets and available space		-0.745162	-0.345162	-0.545162
2	WT in bird priority zones
	A) X% of the area in bird priority zones covered with WT (km2)		0	0	0
	Area balance in km2 (status quo maximum) (km2)		94.5	94.5	94.5
	Area balance in %		1.38118	1.38118	1.38118
	Power balance in MW		2768.85	2768.85	2768.85
	number of plants		553.77	553.77	553.77
	Balance of energy targets and available space		-0.818825	-0.418825	-0.618825
	B) X% of the area in the bird priority zones built on with WT		35.7385	35.7385	35.7385
	Area balance in km2 (status quo maximum)		130.238	130.238	130.238
	Area balance in %		1.90352	1.90352	1.90352
	Power balance in MW		3815.99	3815.99	3815.99
	number of plants		763.198	763.198	763.198
	Balance of energy targets and available space		-0.296485	0.103515	-0.0964849
	C) X% of the area in the bird priority zones built on with WT		71.477	71.477	71.477
	Area balance in km2 (status quo maximum)		165.977	165.977	165.977
	Area balance in %		2.42586	2.42586	2.42586
	Power balance in MW		4863.13	4863.13	4863.13
	number of plants		972.625	972.625	972.625
	Balance of energy targets and available space		0.225855	0.625855	0.425855
	D) 0.96% of the area in the bird priority zones built on with WT		4.50305	4.50305	4.50305
	Area balance in km2 (status quo maximum)		99.0031	99.0031	99.0031
	Area balance in %		1.44699	1.44699	1.44699
	Power balance in MW		131.939	131.939	131.939
	number of plants		26.3879	26.3879	26.3879
	Balance of energy targets and available space		-0.75301	-0.35301	-0.55301
3	Repowering in bird priority zones
	A) 100% repowering (1:1) based on performance
	Output of existing systems in bird priority zones in MW		124.85	124.85	124.85
	Space requirements for existing systems in bird priority zones in km2		4.26109	4.26109	4.26109
	Power balance in MW (status quo maximum)		3041.37	3041.37	3041.37
	attachment count		608.274	608.274	608.274
	Area balance in km2 (status quo maximum)		103.801	103.801	103.801
	Area balance in %		1.51712	1.51712	1.51712
	Balance of energy targets and available space		-0.682884	-0.282884	-0.482884
	B) 200% repowering (2:1) (double the power) in relation to the power
	Output of existing systems in bird priority zones in MW		249.7	249.7	249.7
	Space requirements for existing systems in bird priority zones in km2		8.52218	8.52218	8.52218
	Power balance in MW (status quo maximum)		3166.22	3166.22	3166.22
	attachment count		633.244	633.244	633.244
	Area balance in km2 (status quo maximum)		108.062	108.062	108.062
	Area balance in %		1.57939	1.57939	1.57939
	Balance of energy targets and available space		-0.620605	-0.220605	-0.420605
4	Dismantling of existing systems in bird priority zones
	A) 100% demolition (i.e. no existing systems in bird priority zones) (existing systems are deducted from the expansion potential, ie additional expansion would have to be carried out)
	Output of existing systems in bird priority zones in MW		124.85	124.85	124.85
	Space requirements for existing systems in bird priority zones in km2		4.26109	4.26109	4.26109
	Power balance in MW (status quo maximum)		2791.67	2791.67	2791.67
	attachment count		558.334	558.334	558.334
	Area balance in km2 (status quo maximum)		95.2789	95.2789	95.2789
	Area balance in %		1.39256	1.39256	1.39256
	Balance of energy targets and available space		-0.807441	-0.407441	-0.607441
	B) 50% demolition (i.e. no existing systems in bird priority zones) (existing systems are deducted from the potential for additional construction, ie additional construction would have to be carried out)
	Output of existing systems in bird priority zones in MW		62.425	62.425	62.425
	Space requirements for existing systems in bird priority zones in km2		2.13055	2.13055	2.13055
	Power balance in MW (status quo maximum)		2854.1	2854.1	2854.1
	attachment count		570.819	570.819	570.819
	Area balance in km2 (status quo maximum)		97.4095	97.4095	97.4095
	Area balance in %		1.4237	1.4237	1.4237
	Balance of energy targets and available space		-0.776301	-0.376301	-0.576301
5	Expansion of PV to replace missing wind turbine targets after the area potential has been reached
	A) X% of the area in bird priority zones covered with WT (km2)
	Area potential WT that can be reached (km2)		94.5	94.5	94.5
	Capacity potential of WT (MW) associated with the area potential achieved		2768.85	2768.85	2768.85
	Area balance in % WT		1.38118	1.38118	1.38118
	Area still to be identified (%) in balance with energy targets		-0.818825	-0.418825	-0.618825
	Area still to be identified (%) in balance with energy targets positive value		0.818825	0.418825	0.618825
	Area yet to be identified (km2) in balance with energy targets		56.024	28.656	42.34
	Output to be achieved with WT on the area still required (MW)		1641.5	839.621	1240.56
	With PV, the power to be achieved conveRKed into the area requirement (km2)		16.5808	8.48102	12.5309
	Area balance in % for PV		0.242339	0.123955	0.183147
	Balance of area availability PV and necessary area requirement to achieve wind turbine targets with PV		0.319698	0.438081	0.378889
	Space requirement for PV expansion targets (km2)		0.0144959	0.19392	0.0467165
	Balance of space requirements for PV expansion targets and increase in wind deficit with PV (km2)		-0.227843	0.0699648	-0.136431
	B) X % of the area in bird priority zones covered with WT (km2)
	Area potential WT that can be reached (km2)		130.238	130.238	130.238
	Capacity potential of WT (MW) associated with the area potential achieved		2768.85	2768.85	2768.85
	Area balance in % WT		1.90352	1.90352	1.90352
	Area still to be identified (%) in balance with energy targets		-0.296485	0.103515	-0.0964849
	Area still to be identified (%) in balance with energy targets positive value		0.296485	-0.103515	0.0964849
	Area yet to be identified (km2) in balance with energy targets		20.2855	-7.0825	6.6015
	Output to be achieved with WT on the area still required (MW)		594.365	-207.517	193.424
	With PV, the power to be achieved conveRKed into the area requirement (km2)		6.00369	-2.09613	1.95378
	Area balance in % for PV		0.0877476	-0.0306363	0.0285556
	Balance of area availability PV and necessary area requirement to achieve wind turbine targets with PV		0.474289	0.592673	0.533481
	Space requirement for PV expansion targets (km2)		0.169087	0.348512	0.201308
	Balance of space requirements for PV expansion targets and increase in wind deficit with PV (km2)		0.0813399	0.379148	0.172752
6	Status quo PV on EEG base areas with bird priority zones
	A) PV are expanded according to the EEG area setting and 100% in bird priority zones
	Output potential on EEG base areas (MWp)		3807	3807	3807
	Area potential PV EEG base areas (km2)		38.4545	38.4545	38.4545
	Area balance in %		0.562037	0.562037	0.562037
	Balance of energy targets and available space		0.256835	0.317875	0.229864
7	PV in bird priority zones in the energy mix
	A) X% of the possible output of PV in bird priority zones
	Additional area potential (km2)		0	0	0
	Additional power potential (MW)		0	0	0
	Area balance in km2 (status quo maximum) (km2)		24.1713	24.1713	24.1713
	Area balance in %		0.353278	0.353278	0.353278
	Power balance in MW		2392.96	2392.96	2392.96
	Balance of energy targets and available space		0.0480768	0.109117	0.0211055
	B) X% of the possible power of PV in bird priority zones
	Additional area potential (km2)		1.42832	1.42933	1.43034
	Additional power potential (MWp)		141.404	141.504	141.604
	Area balance in km2 (status quo maximum) (km2)		25.5996	25.6006	25.6017
	Area balance in %		0.374154	0.374169	0.374184
	Output balance in MWp		2534.36	2534.46	2534.56
	Balance of energy targets and available space		0.0689527	0.130008	0.0420109
	C) X% of possible power of PV in bird priority zones
	Additional area potential (km2)		2.85665	2.85867	2.86069
	Additional power potential (MWp)		282.808	283.008	283.208
	Area balance in km2 (status quo maximum) (km2)		27.028	27.03	27.032
	Area balance in %		0.39503	0.39506	0.395089
	Output balance in MWp		2675.77	2675.97	2676.17
	Balance of energy targets and available space		0.0898285	0.150898	0.0629162
8	VeRKical PV in bird priority zones
	A) X% of the possible power of veRKical PV in bird priority zones
	Additional area potential (km2)		2.02006	2.02149	2.02291
	Additional power potential (MW)		70.702	70.752	70.802
	Area balance in km2 (status quo maximum) (km2)		70.3903	70.3918	70.3932
	Area balance in %		1.0288	1.02882	1.02884
	Power balance in MW		2463.66	2463.71	2463.76
	Balance of energy targets and available space		0.723596	0.784657	0.696667
	B) X% of the possible power of veRKical PV in bird priority zones
	Additional area potential (km2)		4.04011	4.04297	4.04583
	Additional power potential (MW)		141.404	141.504	141.604
	Area balance in km2 (status quo maximum) (km2)		72.4104	72.4133	72.4161
	Area balance in %		1.05832	1.05836	1.05841
	Power balance in MW		2534.36	2534.46	2534.56
	Balance of energy targets and available space		0.75312	0.814203	0.726233
	C) X% of the possible power of veRKical PV in bird priority zones
	Additional area potential (km2)		8.08023	8.08594	8.09166
	Additional power potential (MW)		282.808	283.008	283.208
	Area balance in km2 (status quo maximum) (km2)		76.4505	76.4562	76.4619
	Area balance in %		1.11737	1.11745	1.11754
	Power balance in MW		2675.77	2675.97	2676.17
	Balance of energy targets and available space		0.812169	0.873293	0.785365
9	PV and WT together in a bird priority zones
	A) X% of the possible output of PV in bird priority zones and 5% of the area built up with WT (sub-scenarios B)
	Additional area potential (km2)		37.1668	37.1678	37.1688
	Additional power potential (MW)
	Area balance in km2 (status quo maximum) (km2)		193.005	193.007	193.009
	Area balance in %		2.82089	2.82091	2.82094
	Power balance in MW
	Balance of energy targets and available space		0.315683	0.776753	0.488771
	bird priority zones and efficient locations for WT
10	A) X% of the area of the WT in bird priority zones if the wind speed is >5.5 m/sec
	Additional potential in bird priority zones on efficient locations (km2)		103	103	103
	Additional area potential (km2)		10.3	10.3	10.3
	Additional power potential (MW)		301.79	301.79	301.79
	Area balance in km2 (status quo maximum) (km2)		104.8	104.8	104.8
	Area balance in %		1.53172	1.53172	1.53172
	Power balance in MW		3070.64	3070.64	3070.64
	number of plants		614.128	614.128	614.128
	Balance of energy targets and available space		-0.668284	-0.268284	-0.468284
	B) X% of the area of the WT in bird priority zones if the wind speed is >5.5 m/s
	Additional potential in bird priority zones on efficient locations (km2)		103	103	103
	Additional area potential (km2)		5.15	5.15	5.15
	Additional power potential (MW)		150.895	150.895	150.895
	Area balance in km2 (status quo maximum) (km2)		99.65	99.65	99.65
	Area balance in %		1.45645	1.45645	1.45645
	Power balance in MW		2919.75	2919.75	2919.75
	number of plants		583.949	583.949	583.949
	Balance of energy targets and available space		-0.743555	-0.343555	-0.543555
11	bird priority zones and higher power requirements
	A) WT in bird priority zones if they are installed in a 1 km strip with a BImSch buffer of 800 m
	Additional potential in bird priority zones on efficient locations (km2)		322	322	322
	Additional area potential (km2)
	Additional power potential (MW)
	Area balance in km2 (status quo maximum) (km2)		416.5	416.5	416.5
	Area balance in %		6.0874	6.0874	6.0874
	Power balance in MW		178.361	178.361	178.361
	number of plants		35.6722	35.6722	35.6722
	Balance of energy targets and available space		3.8874	4.2874	4.0874
12	bird priority zones and network convenience
	A) WT in bird priority zones, if bird priority zones <5 km at 110 kV substation
	Additional potential in bird priority zones on grid-friendly locations (km2)		298	298	298
	Additional area potential (km2)
	Additional power potential (MW)		8731.4	8731.4	8731.4
	Area balance in km2 (status quo maximum) (km2)		392.5	392.5	392.5
	Area balance in %		5.73663	5.73663	5.73663
	Power balance in MW		11500.2	11500.2	11500.2
	number of plants		2300.05	2300.05	2300.05
	Balance of energy targets and available space		3.53663	3.93663	3.73663
13	bird priority zones and without species buffers under species protection law
	Total area of planning space
	Space requirement bird priority zones approach RM 1 (km2)		6842	714.77	714.77
	Space requirement taboo criteria (km2)		714.77	0	0
	Area potential for WT (km2)		225	225	225
	Area potential WT (%)		3.28851	3.28851	3.28851
	Installable power (MW)		6592.5	6592.5	6592.5
	attachment count		1318.5	1318.5	1318.5
	Balance of energy targets and available space		1.08851	1.48851	1.28851
14	bird priority zones and settlement distances
	A) Settlement distances according to BImSchG (800 m) and exclusion of bird priority zones
	Area potential for WT without species buffers (km2)		275	275	275
	species buffer correction factor according to regional plan 3.0 HF		0.58	0.58	0.58
	Conclusion species buffer-free area		0.42	0.42	0.42
	Area potential for WT with species buffer correction factor (km2)		115.5	115.5	115.5
	Area potential WT with species buffer correction factor (%)		1.6881	1.6881	1.6881
	Installable power (MW)		3384.15	3384.15	3384.15
	attachment count		676.83	676.83	676.83
	Balance of energy targets and available space		-0.511897	-0.111897	-0.311897
15	bird priority zones and wind turbine in the forest
	B) X% of the forest area with WT and exclusion of bird priority zones
	Additional area potential in the forest (km2)		57.754	57.754	57.754
	Additional power potential (MW)		1692.19	1692.19	1692.19
	Area balance in km2 (status quo maximum) (km2)		152.254	152.254	152.254
	Area balance in %		2.22529	2.22529	2.22529
	Power balance in MW		4461.04	4461.04	4461.04
	number of plants		892.208	892.208	892.208
	Balance of energy targets and available space		0.025285	0.425285	0.225285
	C) X% of the forest area with WT and exclusion of bird priority zones
	Additional area potential in the forest (km2)		31.937	31.937	31.937
	Additional power potential (MW)		935.754	935.754	935.754
	Area balance in km2 (status quo maximum) (km2)		126.437	126.437	126.437
	Area balance in %		1.84795	1.84795	1.84795
	Power balance in MW		3704.6	3704.6	3704.6
	number of plants		740.921	740.921	740.921
	Balance of energy targets and available space		-0.352046	0.0479538	-0.152046
16	bird priority zones and LSG
	A) X% WT in LSG and exclusion of bird priority zones
	Additional area potential in the forest (km2)		88.0476	88.0476	88.0476
	Additional power potential (MW)		2579.79	2579.79	2579.79
	Area balance in km2 (status quo maximum) (km2)		182.548	182.548	182.548
	Area balance in %		2.66804	2.66804	2.66804
	Power balance in MW		5348.64	5348.64	5348.64
	number of plants		1069.73	1069.73	1069.73
	Balance of energy targets and available space		0.468044	0.868044	0.668044
	B) X% WT in LSG and exclusion of bird priority zones
	Additional area potential in the forest (km2)		29.3492	29.3492	29.3492
	Additional power potential (MW)		859.932	859.932	859.932
	Area balance in km2 (status quo maximum) (km2)		123.849	123.849	123.849
	Area balance in %		1.81013	1.81013	1.81013
	Power balance in MW		3628.78	3628.78	3628.78
	number of plants		725.756	725.756	725.756
	Balance of energy targets and available space		-0.389868	0.0101315	-0.189868
17	Status Quo Agri PV with bird priority zones
	A) Agri PV are expanded on agricultural land (number of fields <23) and thus 100% in bird priority zones
	Output potential on agricultural land (MWp)		4969	4969	4969
	Area potential Agri PV (km2)		124.225	124.225	124.225
	Area balance in %		1.81562	1.81562	1.81562
	Balance of energy targets and available space		1.51042	1.57146	1.48345
18	A) X% of the possible output of PV in bird priority zones
	Additional area potential (km2)		0	0	0
	Additional power potential (MW)		0	0	0
	Area balance in km2 (status quo maximum) (km2)		78.0843	78.0843	78.0843
	Area balance in %		1.14125	1.14125	1.14125
	Power balance in MW		3123.37	3123.37	3123.37
	Balance of energy targets and available space		0.836048	0.897088	0.809077
	B) X% of the possible power of PV in bird priority zones
	Additional area potential (km2)		4.61407	4.61407	4.61407
	Additional power potential (MWp)		184.563	184.563	184.563
	Area balance in km2 (status quo maximum) (km2)		82.6984	82.6984	82.6984
	Area balance in %		1.20869	1.20869	1.20869
	Output balance in MWp		3307.93	3307.93	3307.93
	Balance of energy targets and available space		0.903485	0.964526	0.876514
	C) X% of possible power of PV in bird priority zones
	Additional area potential (km2)		9.22814	9.22814	9.22814
	Additional power potential (MWp)		369.126	369.126	369.126
	Area balance in km2 (status quo maximum) (km2)		87.3124	87.3124	87.3124
	Area balance in %		1.27612	1.27612	1.27612
	Output balance in MWp		3492.5	3492.5	3492.5
	Balance of energy targets and available space		0.970923	1.03196	0.943952
19	bird priority zones and nature park
	A) X% WT in nature park and exclusion of bird priority zones
	Additional area potential in nature parks (km2)		91.0936	91.0936	91.0936
	Additional power potential (MW)		2669.04	2669.04	2669.04
	Area balance in km2 (status quo maximum) (km2)		185.594	185.594	185.594
	Area balance in %		2.71256	2.71256	2.71256
	Power balance in MW		5437.89	5437.89	5437.89
	number of plants		1087.58	1087.58	1087.58
	Balance of energy targets and available space		0.512564	0.912564	0.712564
	B) X% WT in nature park and exclusion of bird priority zones
	Additional area potential in nature parks (km2)		45.5468	45.5468	45.5468
	Additional power potential (MW)		1458.43	1458.43	1458.43
	Area balance in km2 (status quo maximum) (km2)		140.047	140.047	140.047
	Area balance in %		2.04687	2.04687	2.04687
	Power balance in MW		4103.37	4103.37	4103.37
	number of plants		820.674	820.674	820.674
	Balance of energy targets and available space		-0.153131	0.246869	0.0468693
20	bird priority zones and open space
	A) X % WT in open space and exclusion of bird priority zones
	Additional area potential in nature parks (km2)		76.2544	76.2544	76.2544
	Additional power potential (MW)		2234.25	2234.25	2234.25
	Area balance in km2 (status quo maximum) (km2)		170.754	170.754	170.754
	Area balance in %		2.49568	2.49568	2.49568
	Power balance in MW		5003.1	5003.1	5003.1
	number of plants		1000.62	1000.62	1000.62
	Balance of energy targets and available space		0.29568	0.69568	0.49568
	B) X % WT in open space and exclusion of bird priority zones
	Additional area potential in nature parks (km2)		38.1272	38.1272	38.1272
	Additional power potential (MW)		1117.13	1117.13	1117.13
	Area balance in km2 (status quo maximum) (km2)		132.627	132.627	132.627
	Area balance in %		1.93843	1.93843	1.93843
	Power balance in MW		3885.98	3885.98	3885.98
	number of plants		777.195	777.195	777.195
	Balance of energy targets and available space		-0.261573	0.138427	-0.0615726

## Sheet:  Scenarios Overlapping
	Scenario analysis
	Status: December 2022
	input parameters
	planning region		Region Havelland-Fläming BB	Region Havelland-Fläming BB	Region Havelland-Fläming BB
	Area size (km2)		6842	6842	6842
	spatial targets WEA
	Area share Brandenburg and thus Havelland-Fläming (%)		2.2	1.8	2
	target year		2032 (WaLG)	2027 (WaLG)	2030 (energy strategy BB2030)
	spatial targets PV-FOS
	Power (GW)		107.5	86
	Capacity Brandenburg with federal state distribution key 1:13 (GW)		8.26923	6.61538	9
	shareal capacity Havelland-Fläming (1:4) (GW)		2.06731	1.65385	2.25
	Area requirement in km2		20.8819	16.7055	22.7273
	Area share Havelland-Fläming (%)		0.305202	0.244161	0.332173
			EEG2023	EEG2023	Energy strategy BB 2040
	reference plants
	WT area requirement (km2)		29.3	29.3	29.3
	WT plant size (MW)		5	5	5
	WT rotor diameter (m)		149	149	149
	PV FOS EEG base areas (MWp/km2)		99	99	99
	PV FOS Agriculture (MWp/km2)		40	40	40
	PV FOS vertical (MWp/km2)		35	35	35
	Sub-scenario parameters
	Percentage of built-up area in bird priority zones (%)		0	0	0
	Percentage of built-up area in bird priority zones (%)		5	5	5
	Percentage of built-up area in bird priority zones (%)		10	10	10
	Percentage of built-up area in bird priority zones (%)		0	0	0
	Percentage of built-up area in bird priority zones (%)		0	0	0
	Percentage of built-up area in bird priority zones (%)		1.13	1.13	1.13
	Additional potential in bird priority zones on efficient locations (km2)		17.93	17.93	17.93
	Percentage of the area of the WT in bird priority zones if the wind speed is >5.5 m/s (%)		10	10	10
	Percentage of the area of the WT in bird priority zones if the wind speed is >5.5 m/s (%)		5	5	5
	WT in bird priority zones if they are installed in a 1 km strip with a BImSch buffer of 800 m (km2)		21	21	21
	Additional potential in bird priority zones on grid-friendly locations (km2)		10	10	10
	Percentage of the possible output of PV-FOS in bird priority zones (%)		0	0	0
	Percentage of the possible output of PV-FOS in bird priority zones (%)		10	10	10
	Percentage of the possible output of PV-FOS in bird priority zones (%)		20	20	20
	Percentage of possible output of veRKical PV FOS in bird priority zones (%)		5	5	5
	Percentage of possible output of veRKical PV FOS in bird priority zones (%)		10	10	10
	Percentage of possible output of veRKical PV FOS in bird priority zones (%)		20	20	20
	Space requirement taboo criteria (km2)		0	0	0
	Area potential for WT with a settlement distance of 800 m without species buffers (km2)		287	287	287
	Area potential for WT with forest area (coniferous forest), available with negative planning of fuRKher criteria and exclusion of bird priority zones, without species buffers		237	237	237
	Size of coniferous forest without bird priority zones		1768.76	173.063	173.063
	Percentage of forest area with WT and exclusion of bird priority zones (%)		4	4	4
	Percentage of forest area with WT and exclusion of bird priority zones (%)		2	2	2
	Area size landscape protection areas (km2)		3424.57	3424.57	3424.57
	Area size landscape protection areas without bird priority zones (km2)		3556.45	3556.45	3556.45
	Share of area size in landscape protection areas (km2)		3	3	3
	Share of area size in landscape protection areas (km2)		1	1	1
	Output of existing systems in bird priority zones (MW)		0	0	0
	Percentage of repowering (%) (200% repowering)		2	2	2
	share of dismantling (%) (50% dismantling)		2	2	2
	Area of the nature park (km2)		2488.78	2488.78	2488.78
	Size of nature park without bird priority zones (exclusion?)(km2)		2519.99	2519.99	2519.99
	Percentage of area in nature park (km2)		2	2	2
	Percentage of area in nature park (km2)		4	4	4
	Size of open space areas (km2)		2101.19	2101.19	2101.19
	Size of open space areas without bird priority zones (exclusion) (km2)
	Share of area size in open space areas (km2)		2	2	2
	Share of area size in open space areas (km2)		4	4	4
	Size bird priority zones Approach
	Space requirement bird priority zones approach OS Top 10 (km2)		46.5075	46.5075	46.5075
1	Status quo exclusion planning WT with bird priority zones OS Top 10
	Area potential for WT without species buffers (km2)		235	235	235
	species buffer correction factor according to regional plan 3.0 HF		0.58	0.58	0.58
	Conclusion species buffer-free area		0.42	0.42	0.42
	Area potential for WT with species buffer correction factor (km2)		98.7	98.7	98.7
	Area potential WT with species buffer correction factor (%)		1.44256	1.44256	1.44256
	Installable power (MW)		2891.91	2891.91	2891.91
	attachment count		578.382	578.382	578.382
	Review of exclusion planning without WT in white areas bird priority zones RK Top 5
	White area (km2)		234	234	234
	White area with species buffer correction factor (km2)		135.72	135.72	135.72
	White area with species buffer correction factor (%)		1.98363	1.98363	1.98363
	Status quo exclusion planning WEA WITHOUT bird priority zones OS Top 10
	White area in bird priority zones (km2) without species buffer correction		1.25	1.25	1.25
	Percentage of white area in the region (%)		0.0182695	0.0182695	0.0182695
	species buffer correction factor according to regional plan 3.0 HF		0.58	0.58	0.58
	Conclusion species buffer-free area		0.42	0.42	0.42
	Area potential for WT with species buffer correction factor (km2)		0.525	0.525	0.525
	Area potential WT with species buffer correction factor (%)		1.12885	1.12885	1.12885
	Installable power (MW)		15.3825	15.3825	15.3825
	attachment count		3.0765	3.0765	3.0765
	Is white space in bird priority zones a lot compared to the total white space in the region?
	White area in bird priority zones approach (km2)		0.525
	Total white area region without bird priority zones consideration (km2)		99.54
	share of bird priority zones white area to region white area (km2)		99.015
	share of bird priority zones white area to region white area (%)		0.527426
	How big is the perfoRKance potential that is blocked in bird priority zones?
	Blocked power potential in MW/km2		15.3825
	Blocked attachment count		3.0765
	Status quo WT exclusion planningWITHOUT all bird priority zones
	White area without bird priority zones without species buffers (km2)		237	237	237
	species buffer correction factor according to regional plan 3.0 HF		0.58	0.58	0.58
	Conclusion species buffer-free area		0.42	0.42	0.42
	Area potential for WT with species buffer correction factor (km2)		99.54	99.54	99.54
	Area potential WT with species buffer correction factor (%)		1.45484	1.45484	1.45484
	Installable power (MW)		2916.52	2916.52	2916.52
	attachment count		583.304	583.304	583.304
	How much more can be built into the forest?
	Coniferous forest in white areas depending on the bird priority zones approach (km2)		161	161	161
	Coniferous forest in the region with bird priority zones exclusion (km2)		1768.76	1768.76	1768.76
	Remaining coniferous forest (km2)		1607.76	1607.76	1607.76
	Share of coniferous forest in white area of the total coniferous forest (%)		9.1024	9.1024	9.1024
	Status quo EEG base areas PV-FOS bird priority zones
	Output potential on EEG base areas (MWp)		3807	3807	3807
	Area potential PV-FOS EEG base areas (km2)		38.4545	38.4545	38.4545
	Assumed PV expansion potential in bird priority zones (grid) (MWp)		407.893	407.893	407.893
	Assumed PV expansion potential in bird priority zones (grid) (km2)		4.12013	4.12013	4.12013
	Remaining PV expansion potential outside of bird priority zones (grid) (MWp)		3399.11	3399.11	3399.11
	Remaining PV expansion potential outside of bird priority zones (grid) (km2)		34.3344	34.3344	34.3344
	Status Quo Agri PV-FOS bird priority zones
	PerfoRKance potential on agricultural land (number of fields > 23) (MWp)		4969	4969	4969
	Area potential PV-FOS (km2)		124.225	124.225	124.225
	Assumed PV expansion potential in bird priority zones RK V1 (grid) (MWp)		532.39	532.39	532.39
	Assumed PV expansion potential in bird priority zones RK V1 (grid) (km2)		13.3097	13.3097	13.3097
	Remaining PV expansion potential outside of bird priority zones (grid) (MWp)		4436.61	4436.61	4436.61
	Remaining PV expansion potential outside of bird priority zones (grid) (km2)		110.915	110.915	110.915
	Scenario Outcomes
	energy target dimensions		Alternate A.D1	Alternative B.D1	Alternative B.D1
	source		Wind Energy Requirements Act	Wind Energy Requirements Act	Energy Strategy 2040 BB
	distribution key		2.2% Brandenburg by 2032	1.8% Brandenburg by 2032	2.0% Brandenburg up to2030
	Distribution key for HF		6842 km2 * 0.022 = 150.524 km2	6842 km2 * 0.02 = 136.84 km2	6842 km2 * 0.02 = 136.84 km2
No.	scenarios
1	Status Quo Maximumwithout bird priority zones
	Total area of planning space		6842	6842	6842
	Space requirement bird priority zones approach RK 1 Top 5 (km2)		46.5075	46.5075	46.5075
	Space requirement taboo criteria (km2)
	Area potential for WT (km2)		99.54	99.54	99.54
	Area potential WT (%)		1.45484	1.45484	1.45484
	Installable power (MW)		2916.52	2916.52	2916.52
	attachment count		583.304	583.304	583.304
	Balance of energy targets and available space		-0.745162	-0.345162	-0.545162
2	WEA in bird priority zones
	A) X% of the area in bird priority zones covered with WT (km2)		0	0	0
	Area balance in km2 (status quo maximum) (km2)		98.7	98.7	98.7
	Area balance in %		1.44256	1.44256	1.44256
	Power balance in MW		2891.91	2891.91	2891.91
	number of plants		578.382	578.382	578.382
	Balance of energy targets and available space		-0.757439	-0.357439	-0.557439
	B) X% of the area in the bird priority zones built on with WT		2.32538	2.32538	2.32538
	Area balance in km2 (status quo maximum)		101.025	101.025	101.025
	Area balance in %		1.47655	1.47655	1.47655
	Power balance in MW		2960.04	2960.04	2960.04
	number of plants		592.009	592.009	592.009
	Balance of energy targets and available space		-0.723453	-0.323453	-0.523453
	C) X% of the area in the bird priority zones built on with WT		4.65075	4.65075	4.65075
	Area balance in km2 (status quo maximum)		103.351	103.351	103.351
	Area balance in %		1.51053	1.51053	1.51053
	Power balance in MW		3028.18	3028.18	3028.18
	number of plants		605.635	605.635	605.635
	Balance of energy targets and available space		-0.689466	-0.289466	-0.489466
	D) 1.25% of the area in the bird priority zones built on with WT		0.525535	0.525535	0.525535
	Area balance in km2 (status quo maximum)		99.2255	99.2255	99.2255
	Area balance in %		1.45024	1.45024	1.45024
	Power balance in MW		15.3982	15.3982	15.3982
	number of plants		3.07963	3.07963	3.07963
	Balance of energy targets and available space		-0.749758	-0.349758	-0.549758
3	Repowering in bird priority zones
	A) 100% repowering (1:1) based on perfoRKance
	Output of existing systems in bird priority zones in MW		0	0	0
	Space requirements for existing systems in bird priority zones in km2		0	0	0
	Power balance in MW (status quo maximum)		2916.52	2916.52	2916.52
	attachment count		583.304	583.304	583.304
	Area balance in km2 (status quo maximum)		99.54	99.54	99.54
	Area balance in %		1.45484	1.45484	1.45484
	Balance of energy targets and available space		-0.745162	-0.345162	-0.545162
	B) 200% repowering (2:1) (double the power) in relation to the power
	Output of existing systems in bird priority zones in MW		0	0	0
	Space requirements for existing systems in bird priority zones in km2		0	0	0
	Power balance in MW (status quo maximum)		2916.52	2916.52	2916.52
	attachment count		583.304	583.304	583.304
	Area balance in km2 (status quo maximum)		99.54	99.54	99.54
	Area balance in %		1.45484	1.45484	1.45484
	Balance of energy targets and available space		-0.745162	-0.345162	-0.545162
4	Dismantling of existing systems in bird priority zones
	A) 100% demolition (i.e. no existing systems in bird priority zones) (existing systems are deducted from the expansion potential, ie additional expansion would have to be carried out)
	Output of existing systems in bird priority zones in MW		0	0	0
	Space requirements for existing systems in bird priority zones in km2		0	0	0
	Power balance in MW (status quo maximum)		2916.52	2916.52	2916.52
	attachment count		583.304	583.304	583.304
	Area balance in km2 (status quo maximum)		99.54	99.54	99.54
	Area balance in %		1.45484	1.45484	1.45484
	Balance of energy targets and available space		-0.745162	-0.345162	-0.545162
	B) 50% demolition (i.e. no existing systems in bird priority zones) (existing systems are deducted from the potential for additional construction, ie additional construction would have to be carried out)
	Output of existing systems in bird priority zones in MW		0	0	0
	Space requirements for existing systems in bird priority zones in km2		0	0	0
	Power balance in MW (status quo maximum)		2916.52	2916.52	2916.52
	attachment count		583.304	583.304	583.304
	Area balance in km2 (status quo maximum)		99.54	99.54	99.54
	Area balance in %		1.45484	1.45484	1.45484
	Balance of energy targets and available space		-0.745162	-0.345162	-0.545162
5	Expansion of PV-FOS to replace missing wind turbine targets after the area potential has been reached
	A) X% of the area in bird priority zones covered with WT (km2)
	Area potential WT that can be reached (km2)		98.7	98.7	98.7
	Capacity potential of WT (MW) associated with the area potential achieved		2891.91	2891.91	2891.91
	Area balance in % WEA		1.44256	1.44256	1.44256
	Area still to be identified (%) in balance with energy targets		-0.757439	-0.357439	-0.557439
	Area still to be identified (%) in balance with energy targets positive value		0.757439	0.357439	0.557439
	Area yet to be identified (km2) in balance with energy targets		51.824	24.456	38.14
	Output to be achieved with WT on the area still required (MW)		1518.44	716.561	1117.5
	With PV-FOS, the power to be achieved conveRKed into the area requirement (km2)		15.3378	7.23799	11.2879
	Area balance in % for PV-FOS		0.224171	0.105788	0.16498
	Balance of area availability PV-FOS and necessary area requirement to achieve wind turbine targets with PV		0.337865	0.456249	0.397057
	Space requirement for PV expansion targets (km2)		0.0326635	0.212088	0.0648842
	Balance of space requirements for PV expansion targets and increase in wind deficit with PV (km2)		-0.191508	0.1063	-0.100095
	B) X % of the area in bird priority zones covered with WT (km2)
	Area potential WT that can be reached (km2)		101.025	101.025	101.025
	Capacity potential of WT (MW) associated with the area potential achieved		2891.91	2891.91	2891.91
	Area balance in % WEA		1.47655	1.47655	1.47655
	Area still to be identified (%) in balance with energy targets		-0.723453	-0.323453	-0.523453
	Area still to be identified (%) in balance with energy targets positive value		0.723453	0.323453	0.523453
	Area yet to be identified (km2) in balance with energy targets		49.4986	22.1306	35.8146
	Output to be achieved with WT on the area still required (MW)		1450.31	648.427	1049.37
	With PV-FOS, the power to be achieved conveRKed into the area requirement (km2)		14.6496	6.54977	10.5997
	Area balance in % for PV-FOS		0.214113	0.0957289	0.154921
	Balance of area availability PV-FOS and necessary area requirement to achieve wind turbine targets with PV		0.347924	0.466308	0.407116
	Space requirement for PV expansion targets (km2)		0.0427223	0.222146	0.0749429
	Balance of space requirements for PV expansion targets and increase in wind deficit with PV (km2)		-0.17139	0.126418	-0.0799779
6	Status quo PV-FOS on EEG base areas with bird priority zones
	A) PV-FOS are expanded according to the EEG area setting and 100% in bird priority zones
	Output potential on EEG base areas (MWp)		3807	3807	3807
	Area potential PV-FOS EEG base areas (km2)		38.4545	38.4545	38.4545
	Area balance in %		0.562037	0.562037	0.562037
	Balance of energy targets and available space		0.256835	0.317875	0.229864
7	PV-FOS in bird priority zones in the energy mix
	A) X% of the possible output of PV-FOS in bird priority zones
	Additional area potential (km2)		0	0	0
	Additional power potential (MW)		0	0	0
	Area balance in km2 (status quo maximum) (km2)		34.3344	34.3344	34.3344
	Area balance in %		0.501818	0.501818	0.501818
	Power balance in MW		3399.11	3399.11	3399.11
	Balance of energy targets and available space		0.196617	0.257657	0.169645
	B) X% of the possible power of PV-FOS in bird priority zones
	Additional area potential (km2)		0.412013	0.412013	0.412013
	Additional power potential (MWp)		40.7893	40.7893	40.7893
	Area balance in km2 (status quo maximum) (km2)		34.7464	34.7464	34.7464
	Area balance in %		0.50784	0.50784	0.50784
	Output balance in MWp		3439.9	3439.9	3439.9
	Balance of energy targets and available space		0.202639	0.263679	0.175667
	C) X% of possible power of PV-FOS in bird priority zones
	Additional area potential (km2)		0.824026	0.824026	0.824026
	Additional power potential (MWp)		81.5785	81.5785	81.5785
	Area balance in km2 (status quo maximum) (km2)		35.1584	35.1584	35.1584
	Area balance in %		0.513862	0.513862	0.513862
	Output balance in MWp		3480.69	3480.69	3480.69
	Balance of energy targets and available space		0.20866	0.269701	0.181689
8	VeRKical PV FOS in bird priority zones
	A) X% of the possible power of veRKical PV FOS in bird priority zones
	Additional area potential (km2)		0.582704	0.582704	0.582704
	Additional power potential (MW)		20.3946	20.3946	20.3946
	Area balance in km2 (status quo maximum) (km2)		97.7001	97.7001	97.7001
	Area balance in %		1.42795	1.42795	1.42795
	Power balance in MW		3419.5	3419.5	3419.5
	Balance of energy targets and available space		1.12274	1.18378	1.09577
	B) X% of the possible power of veRKical PV-FOS in bird priority zones
	Additional area potential (km2)		1.16541	1.16541	1.16541
	Additional power potential (MW)		40.7893	40.7893	40.7893
	Area balance in km2 (status quo maximum) (km2)		98.2828	98.2828	98.2828
	Area balance in %		1.43646	1.43646	1.43646
	Power balance in MW		3439.9	3439.9	3439.9
	Balance of energy targets and available space		1.13126	1.1923	1.10429
	C) X% of the possible power of veRKical PV-FOS in bird priority zones
	Additional area potential (km2)		2.33082	2.33082	2.33082
	Additional power potential (MW)		81.5785	81.5785	81.5785
	Area balance in km2 (status quo maximum) (km2)		99.4482	99.4482	99.4482
	Area balance in %		1.4535	1.4535	1.4535
	Power balance in MW		3480.69	3480.69	3480.69
	Balance of energy targets and available space		1.14829	1.20933	1.12132
9	PV-FOS and WEA together in a bird priority zones
	A) X% of the possible output of PV-FOS in bird priority zones and 5% of the area built up with WT (sub-scenarios B)
	Additional area potential (km2)		2.73739	2.73739	2.73739
	Additional power potential (MW)
	Area balance in km2 (status quo maximum) (km2)		138.509	138.509	138.509
	Area balance in %		2.0244	2.0244	2.0244
	Power balance in MW
	Balance of energy targets and available space		-0.480805	-0.019765	-0.307777
	bird priority zones and efficient locations for WT
10	A) X% of the area of the WT in bird priority zones if the wind speed is >5.5 m/sec
	Additional potential in bird priority zones on efficient locations (km2)		17.93	17.93	17.93
	Additional area potential (km2)		1.793	1.793	1.793
	Additional power potential (MW)		52.5349	52.5349	52.5349
	Area balance in km2 (status quo maximum) (km2)		100.493	100.493	100.493
	Area balance in %		1.46877	1.46877	1.46877
	Power balance in MW		2944.44	2944.44	2944.44
	number of plants		588.889	588.889	588.889
	Balance of energy targets and available space		-0.731234	-0.331234	-0.531234
	B) X% of the area of the WT in bird priority zones if the wind speed is >5.5 m/s
	Additional potential in bird priority zones on efficient locations (km2)		17.93	17.93	17.93
	Additional area potential (km2)		0.8965	0.8965	0.8965
	Additional power potential (MW)		26.2675	26.2675	26.2675
	Area balance in km2 (status quo maximum) (km2)		99.5965	99.5965	99.5965
	Area balance in %		1.45566	1.45566	1.45566
	Power balance in MW		2918.18	2918.18	2918.18
	number of plants		583.635	583.635	583.635
	Balance of energy targets and available space		-0.744336	-0.344336	-0.544336
11	bird priority zones and higher power requirements
	A) WT in bird priority zones if they are installed in a 1 km strip with a BImSch buffer of 800 m
	Additional potential in bird priority zones on efficient locations (km2)		21	21	21
	Additional area potential (km2)
	Additional power potential (MW)
	Area balance in km2 (status quo maximum) (km2)		119.7	119.7	119.7
	Area balance in %		1.74949	1.74949	1.74949
	Power balance in MW		51.26	51.26	51.26
	number of plants		10.252	10.252	10.252
	Balance of energy targets and available space		-0.450512	-0.0505115	-0.250512
12	bird priority zones and network convenience
	A) WT in bird priority zones, if bird priority zones <5 km at 110 kV substation
	Additional potential in bird priority zones on grid-friendly locations (km2)		10	10	10
	Additional area potential (km2)
	Additional power potential (MW)		293	293	293
	Area balance in km2 (status quo maximum) (km2)		108.7	108.7	108.7
	Area balance in %		1.58872	1.58872	1.58872
	Power balance in MW		3184.91	3184.91	3184.91
	number of plants		636.982	636.982	636.982
	Balance of energy targets and available space		-0.611283	-0.211283	-0.411283
13	Bird priority zone and without species buffers under species protection law
	Total area of planning space
	Space requirement bird priority zones approach RK 1 (km2)		6842	46.5075	46.5075
	Space requirement taboo criteria (km2)		46.5075	0	0
	Area potential for WT (km2)		235	235	235
	Area potential WT (%)		3.43467	3.43467	3.43467
	Installable power (MW)		6885.5	6885.5	6885.5
	attachment count		1377.1	1377.1	1377.1
	Balance of energy targets and available space		1.23467	1.63467	1.43467
14	bird priority zones and settlement distances
	A) Settlement distances according to BImSchG (800 m) and exclusion of bird priority zones
	Area potential for WT without species buffers (km2)		287	287	287
	species buffer correction factor according to regional plan 3.0 HF		0.58	0.58	0.58
	Conclusion species buffer-free area		0.42	0.42	0.42
	Area potential for WT with species buffer correction factor (km2)		120.54	120.54	120.54
	Area potential WT with species buffer correction factor (%)		1.76177	1.76177	1.76177
	Installable power (MW)		3531.82	3531.82	3531.82
	attachment count		706.364	706.364	706.364
	Balance of energy targets and available space		-0.438234	-0.0382344	-0.238234
15	bird priority zones and wind turbine in the forest
	B) X% of the forest area (mixed forest) with WT and the exclusion of bird priority zones
	Additional area potential in the forest (km2)		64.3106	64.3106	64.3106
	Additional power potential (MW)		1884.3	1884.3	1884.3
	Area balance in km2 (status quo maximum) (km2)		163.011	163.011	163.011
	Area balance in %		2.3825	2.3825	2.3825
	Power balance in MW		4776.21	4776.21	4776.21
	number of plants		955.242	955.242	955.242
	Balance of energy targets and available space		0.182499	0.582499	0.382499
	C) X% of the forest area (mixed forest) with WT and the exclusion of bird priority zones
	Additional area potential in the forest (km2)		32.1553	32.1553	32.1553
	Additional power potential (MW)		942.15	942.15	942.15
	Area balance in km2 (status quo maximum) (km2)		130.855	130.855	130.855
	Area balance in %		1.91253	1.91253	1.91253
	Power balance in MW		3834.06	3834.06	3834.06
	number of plants		766.812	766.812	766.812
	Balance of energy targets and available space		-0.28747	0.11253	-0.0874703
16	bird priority zones and landscape protection areas
	A) X% WT in landscape protection areas and exclusion of bird priority zones
	Additional area potential in the forest (km2)		102.737	102.737	102.737
	Additional power potential (MW)		3010.19	3010.19	3010.19
	Area balance in km2 (status quo maximum) (km2)		201.437	201.437	201.437
	Area balance in %		2.94412	2.94412	2.94412
	Power balance in MW		5902.1	5902.1	5902.1
	number of plants		1180.42	1180.42	1180.42
	Balance of energy targets and available space		0.744125	1.14412	0.944125
	B) X% WT in landscape protection areas and exclusion of bird priority zones
	Additional area potential in the forest (km2)		34.2457	34.2457	34.2457
	Additional power potential (MW)		1003.4	1003.4	1003.4
	Area balance in km2 (status quo maximum) (km2)		132.946	132.946	132.946
	Area balance in %		1.94308	1.94308	1.94308
	Power balance in MW		3895.31	3895.31	3895.31
	number of plants		779.062	779.062	779.062
	Balance of energy targets and available space		-0.256918	0.143082	-0.056918
17	Status Quo Agri PV-FOS with bird priority zones
	A) Agri PV-FOS are expanded on agricultural land (number of fields <23) and thus 100% in bird priority zones
	Output potential on agricultural land (MWp)		4969	4969	4969
	Area potential Agri PV-FOS (km2)		124.225	124.225	124.225
	Area balance in %		1.81562	1.81562	1.81562
	Balance of energy targets and available space		1.51042	1.57146	1.48345
18	A) X% of the possible output of PV-FOS in bird priority zones
	Additional area potential (km2)		0	0	0
	Additional power potential (MW)		0	0	0
	Area balance in km2 (status quo maximum) (km2)		110.915	110.915	110.915
	Area balance in %		1.62109	1.62109	1.62109
	Power balance in MW		4436.61	4436.61	4436.61
	Balance of energy targets and available space		1.31589	1.37693	1.28892
	B) X% of the possible power of PV-FOS in bird priority zones
	Additional area potential (km2)		1.33098	1.33098	1.33098
	Additional power potential (MWp)		53.239	53.239	53.239
	Area balance in km2 (status quo maximum) (km2)		112.246	112.246	112.246
	Area balance in %		1.64055	1.64055	1.64055
	Output balance in MWp		4489.85	4489.85	4489.85
	Balance of energy targets and available space		1.33535	1.39639	1.30837
	C) X% of possible power of PV-FOS in bird priority zones
	Additional area potential (km2)		2.66195	2.66195	2.66195
	Additional power potential (MWp)		106.478	106.478	106.478
	Area balance in km2 (status quo maximum) (km2)		113.577	113.577	113.577
	Area balance in %		1.66	1.66	1.66
	Output balance in MWp		4543.09	4543.09	4543.09
	Balance of energy targets and available space		1.3548	1.41584	1.32783
19	bird priority zones and nature park
	A) X% WT in nature park and exclusion of bird priority zones
	Additional area potential in nature parks (km2)		99.5512	99.5512	99.5512
	Additional power potential (MW)		2916.85	2916.85	2916.85
	Area balance in km2 (status quo maximum) (km2)		198.251	198.251	198.251
	Area balance in %		2.89756	2.89756	2.89756
	Power balance in MW		5808.76	5808.76	5808.76
	number of plants		1161.75	1161.75	1161.75
	Balance of energy targets and available space		0.697562	1.09756	0.897562
	B) X% WT in nature park and exclusion of bird priority zones
	Additional area potential in nature parks (km2)		49.7756	49.7756	49.7756
	Additional power potential (MW)		1458.43	1458.43	1458.43
	Area balance in km2 (status quo maximum) (km2)		148.476	148.476	148.476
	Area balance in %		2.17006	2.17006	2.17006
	Power balance in MW		4350.34	4350.34	4350.34
	number of plants		870.067	870.067	870.067
	Balance of energy targets and available space		-0.0299386	0.370061	0.170061
20	bird priority zones and open space
	A) X % WT in open space and exclusion of bird priority zones
	Additional area potential in nature parks (km2)		84.0476	84.0476	84.0476
	Additional power potential (MW)		2462.59	2462.59	2462.59
	Area balance in km2 (status quo maximum) (km2)		182.748	182.748	182.748
	Area balance in %		2.67097	2.67097	2.67097
	Power balance in MW		5354.5	5354.5	5354.5
	number of plants		1070.9	1070.9	1070.9
	Balance of energy targets and available space		0.470968	0.870968	0.670968
	B) X % WT in open space and exclusion of bird priority zones
	Additional area potential in nature parks (km2)		42.0238	42.0238	42.0238
	Additional power potential (MW)		1231.3	1231.3	1231.3
	Area balance in km2 (status quo maximum) (km2)		140.724	140.724	140.724
	Area balance in %		2.05676	2.05676	2.05676
	Power balance in MW		4123.21	4123.21	4123.21
	number of plants		824.641	824.641	824.641
	Balance of energy targets and available space		-0.143236	0.256764	0.0567641

## Sheet:  Scenarios All
	Scenario analysis
	Status: December 2022
	input parameters
	planning region		Region Havelland-Fläming BB	Region Havelland-Fläming BB	Region Havelland-Fläming BB
	Area size (km2)		6842	6842	6842
	spatial targets WT
	Area share Brandenburg and thus Havelland-Fläming (%)		2.2	1.8	2
	target year		2032 (WaLG)	2027 (WaLG)	2030 (energy strategy BB2030)
	spatial targets PV-FOS
	Power GeRKany (GW)		107.5	86
	Capacity Brandenburg with federal state distribution key 1:13 (GW)		8.26923	6.61538	9
	shareal capacity Havelland-Fläming (1:4) (GW)		2.06731	1.65385	2.25
	Area requirement in km2		20.8819	16.7055	22.7273
	Area share Havelland-Fläming (%)		0.305202	0.244161	0.332173
			EEG2023	EEG2023	Energy strategy BB 2040
	reference plants
	WT area requirement (km2)		29.3	29.3	29.3
	WT plant size (MW)		5	5	5
	WT rotor diameter (m)		149	149	149
	PV EEG base areas (MWp/km2)		99	99	99
	PV Agriculture (MWp/km2)		40	40	40
	PV vertical (MWp/km2)		35	35	35
	Sub-scenario parameters
	Percentage of built-up area in bird priority zoness (%)		0	0	0
	Percentage of built-up area in bird priority zoness (%)		5	5	5
	Percentage of built-up area in bird priority zoness (%)		10	10	10
	Percentage of built-up area in bird priority zoness (%)		0	0	0
	Percentage of built-up area in bird priority zoness (%)		0	0	0
	Percentage of built-up area in bird priority zoness (%)		0.47	0.47	0.47
	Additional potential in bird priority zoness on efficient locations (km2)		307	307	307
	Percentage of the area of the WT in bird priority zones if the wind speed is >5.5 m/s (%)		10	10	10
	Percentage of the area of the WT in bird priority zones if the wind speed is >5.5 m/s (%)		5	5	5
	WT in bird priority zoness if they are installed in a 1 km strip with a BImSch buffer of 800 m (km2)		556	556	556
	Additional potential in bird priority zoness on grid-friendly locations (km2)		323	323	323
	Percentage of the possible output of PV-FOS in bird priority zoness (%)		0	0	0
	Percentage of the possible output of PV-FOS in bird priority zoness (%)		10	10	10
	Percentage of the possible output of PV-FOS in bird priority zoness (%)		20	20	20
	Percentage of possible output of veRKical PV in bird priority zoness (%)		5	5	5
	Percentage of possible output of veRKical PV in bird priority zoness (%)		10	10	10
	Percentage of possible output of veRKical PV in bird priority zoness (%)		20	20	20
	Space requirement taboo criteria (km2)		0	0	0
	Area potential for WT with a settlement distance of 800 m without species buffers (km2)		271	271	271
	Area potential for WT with forest area (coniferous forest), available with negative planning of fuRKher criteria and exclusion of bird priority zoness, without species buffers		237	237	237
	Area size coniferous forest without bird priority zones exclusion		1505.61	1505.61	1505.61
	Percentage of forest area with WT and exclusion of bird priority zoness (%)		4	4	4
	Percentage of forest area with WT and exclusion of bird priority zoness (%)		2	2	2
	Area size landscape protection areas (km2)		2520.65	2520.65	2520.65
	Area size landscape protection areas without bird priority zones (exclusion) (km2)		3556.45	3556.45	3556.45
	Share of area size in landscape protection areas (km2)		3	3	3
	Share of area size in landscape protection areas (km2)		1	1	1
	Output of existing systems in bird priority zoness (MW)		129.349	129.349	129.349
	Percentage of repowering (%) (200% repowering)		2	2	2
	share of dismantling (%) (50% dismantling)		2	2	2
	Area of the nature park (km2)		1954.93	1954.93	1954.93
	Size of nature park without bird priority zones (exclusion?)(km2)		2519.99	2519.99	2519.99
	Percentage of area in nature park (km2)		2	2	2
	Percentage of area in nature park (km2)		4	4	4
	Size of open space areas (km2)		1590.13	1590.13	1590.13
	Size of open space areas without bird priority zoness (exclusion) (km2)
	Share of area size in open space areas (km2)		2	2	2
	Share of area size in open space areas (km2)		4	4	4
	Size bird priority zones Approach
	Space requirement bird priority zones approach OS Top 10 (km2)		1211.56	1211.56	1211.56
1	Status quo exclusion planning WT with bird priority zones OS Top 10
	Area potential for WT without species buffers (km2)		222	222	222
	species buffer correction factor according to regional plan 3.0 HF		0.58	0.58	0.58
	Conclusion species buffer-free area		0.42	0.42	0.42
	Area potential for WT with species buffer correction factor (km2)		93.24	93.24	93.24
	Area potential WT with species buffer correction factor (%)		1.36276	1.36276	1.36276
	Installable power (MW)		2731.93	2731.93	2731.93
	attachment count		546.386	546.386	546.386
	Review of exclusion planning without WT in white areas bird priority zones RK Top 5
	White area (km2)		234	234	234
	White area with species buffer correction factor (km2)		135.72	135.72	135.72
	White area with species buffer correction factor (%)		1.98363	1.98363	1.98363
	Status quo exclusion planning WT WITHOUT bird priority zones OS Top 10
	White area in bird priority zones (km2) without species buffer correction		13.4836	13.4836	13.4836
	Percentage of white area in the region (%)		0.197071	0.197071	0.197071
	species buffer correction factor according to regional plan 3.0 HF		0.58	0.58	0.58
	Conclusion species buffer-free area		0.42	0.42	0.42
	Area potential for WT with species buffer correction factor (km2)		5.66311	5.66311	5.66311
	Area potential WT with species buffer correction factor (%)		0.467422	0.467422	0.467422
	Installable power (MW)		165.929	165.929	165.929
	attachment count		33.1858	33.1858	33.1858
	Is white space in bird priority zones a lot compared to the total white space in the region?
	White area in bird priority zones approach (km2)		5.66311
	Total white area region without bird priority zones consideration (km2)		99.54
	share of bird priority zones white area to region white area (km2)		93.8769
	share of bird priority zones white area to region white area (%)		5.68928
	How big is the perfoRKance potential that is blocked in bird priority zones?
	Blocked power potential in MW		165.929
	Blocked attachment count		33.1858
	Status quo WT exclusion planningWITHOUT all bird priority zones
	White area without bird priority zoness without species buffers (km2)		237	237	237
	species buffer correction factor according to regional plan 3.0 HF		0.58	0.58	0.58
	Conclusion species buffer-free area		0.42	0.42	0.42
	Area potential for WT with species buffer correction factor (km2)		99.54	99.54	99.54
	Area potential WT with species buffer correction factor (%)		1.45484	1.45484	1.45484
	Installable power (MW)		2916.52	2916.52	2916.52
	attachment count		583.304	583.304	583.304
	How much more can be built into the forest?
	Coniferous forest in white areas depending on the bird priority zones approach (km2)		151	151	151
	Coniferous forest in the region with bird priority zones exclusion (km2)		1505.61	1505.61	1505.61
	Remaining coniferous forest (km2)		1354.61	1354.61	1354.61
	Share of coniferous forest in white area of the total coniferous forest (%)		10.0292	10.0292	10.0292
	Status quo EEG base areas PV-FOS bird priority zones
	Output potential on EEG base areas (MWp)		3807	3807	3807
	Area potential PV-FOS EEG base areas (km2)		38.4545	38.4545	38.4545
	Assumed PV expansion potential in bird priority zoness (grid) (MWp)		1685.96	1685.96	1685.96
	Assumed PV expansion potential in bird priority zoness (grid) (km2)		17.0299	17.0299	17.0299
	Remaining PV expansion potential outside of bird priority zoness (grid) (MWp)		2121.04	2121.04	2121.04
	Remaining PV expansion potential outside of bird priority zoness (grid) (km2)		21.4247	21.4247	21.4247
	Status Quo Agri PV-FOS bird priority zones
	PerfoRKance potential on agricultural land (number of fields > 23) (MWp)		4969	4969	4969
	Area potential PV-FOS (km2)		124.225	124.225	124.225
	Assumed PV expansion potential in bird priority zoness RK V1 (grid) (MWp)		2200.56	2200.56	2200.56
	Assumed PV expansion potential in bird priority zoness RK V1 (grid) (km2)		55.0139	55.0139	55.0139
	Remaining PV expansion potential outside of bird priority zoness (grid) (MWp)		2768.44	2768.44	2768.44
	Remaining PV expansion potential outside of bird priority zoness (grid) (km2)		69.2111	69.2111	69.2111
	Scenario Outcomes
	energy target dimensions		Alternate A.D1	Alternative B.D1	Alternative B.D1
	source		Wind Energy Requirements Act	Wind Energy Requirements Act	Energy Strategy 2040 BB
	distribution key		2.2% Brandenburg by 2032	1.8% Brandenburg by 2032	2.0% Brandenburg up toXXXX
	Distribution key for HF		6842 km2 * 0.022 = 150.524 km2	6842 km2 * 0.02 = 136.84 km2	6842 km2 * 0.02 = 136.84 km2
No.	scenarios
1	Status Quo Maximumwithout bird priority zones
	Total area of planning space		6842	6842	6842
	Space requirement bird priority zones approach RK 1 Top 5 (km2)		1211.56	1211.56	1211.56
	Space requirement taboo criteria (km2)
	Area potential for WT (km2)		99.54	99.54	99.54
	Area potential WT (%)		1.45484	1.45484	1.45484
	Installable power (MW)		2916.52	2916.52	2916.52
	attachment count		583.304	583.304	583.304
	Balance of energy targets and available space		-0.745162	-0.345162	-0.545162
2	WT in bird priority zones
	A) X% of the area in bird priority zones covered with WT (km2)		0	0	0
	Area balance in km2 (status quo maximum) (km2)		93.24	93.24	93.24
	Area balance in %		1.36276	1.36276	1.36276
	Power balance in MW		2731.93	2731.93	2731.93
	number of plants		546.386	546.386	546.386
	Balance of energy targets and available space		-0.837241	-0.437241	-0.637241
	B) X% of the area in the bird priority zones built on with WT		60.5781	60.5781	60.5781
	Area balance in km2 (status quo maximum)		153.818	153.818	153.818
	Area balance in %		2.24815	2.24815	2.24815
	Power balance in MW		4506.87	4506.87	4506.87
	number of plants		901.374	901.374	901.374
	Balance of energy targets and available space		0.0481459	0.448146	0.248146
	C) X% of the area in the bird priority zones built on with WT		121.156	121.156	121.156
	Area balance in km2 (status quo maximum)		214.396	214.396	214.396
	Area balance in %		3.13353	3.13353	3.13353
	Power balance in MW		6281.81	6281.81	6281.81
	number of plants		1256.36	1256.36	1256.36
	Balance of energy targets and available space		0.933532	1.33353	1.13353
	D) 0.96% of the area in the bird priority zones built on with WT		5.69435	5.69435	5.69435
	Area balance in km2 (status quo maximum)		98.9343	98.9343	98.9343
	Area balance in %		1.44599	1.44599	1.44599
	Power balance in MW		166.844	166.844	166.844
	number of plants		33.3689	33.3689	33.3689
	Balance of energy targets and available space		-0.754014	-0.354014	-0.554014
3	Repowering in bird priority zones
	A) 100% repowering (1:1) based on perfoRKance
	Output of existing systems in bird priority zoness in MW		129.349	129.349	129.349
	Space requirements for existing systems in bird priority zoness in km2		4.41464	4.41464	4.41464
	Power balance in MW (status quo maximum)		3045.87	3045.87	3045.87
	attachment count		609.174	609.174	609.174
	Area balance in km2 (status quo maximum)		103.955	103.955	103.955
	Area balance in %		1.51936	1.51936	1.51936
	Balance of energy targets and available space		-0.68064	-0.28064	-0.48064
	B) 200% repowering (2:1) (double the power) in relation to the power
	Output of existing systems in bird priority zoness in MW		258.698	258.698	258.698
	Space requirements for existing systems in bird priority zoness in km2		8.82928	8.82928	8.82928
	Power balance in MW (status quo maximum)		3175.22	3175.22	3175.22
	attachment count		635.044	635.044	635.044
	Area balance in km2 (status quo maximum)		108.369	108.369	108.369
	Area balance in %		1.58388	1.58388	1.58388
	Balance of energy targets and available space		-0.616117	-0.216117	-0.416117
4	Dismantling of existing systems in bird priority zoness
	A) 100% demolition (i.e. no existing systems in bird priority zoness) (existing systems are deducted from the expansion potential, ie additional expansion would have to be carried out)
	Output of existing systems in bird priority zoness in MW		129.349	129.349	129.349
	Space requirements for existing systems in bird priority zoness in km2		4.41464	4.41464	4.41464
	Power balance in MW (status quo maximum)		2787.17	2787.17	2787.17
	attachment count		557.435	557.435	557.435
	Area balance in km2 (status quo maximum)		95.1254	95.1254	95.1254
	Area balance in %		1.39032	1.39032	1.39032
	Balance of energy targets and available space		-0.809685	-0.409685	-0.609685
	B) 50% demolition (i.e. no existing systems in bird priority zoness) (existing systems are deducted from the potential for additional construction, ie additional construction would have to be carried out)
	Output of existing systems in bird priority zoness in MW		64.6745	64.6745	64.6745
	Space requirements for existing systems in bird priority zoness in km2		2.20732	2.20732	2.20732
	Power balance in MW (status quo maximum)		2851.85	2851.85	2851.85
	attachment count		570.37	570.37	570.37
	Area balance in km2 (status quo maximum)		97.3327	97.3327	97.3327
	Area balance in %		1.42258	1.42258	1.42258
	Balance of energy targets and available space		-0.777424	-0.377424	-0.577424
5	Expansion of PV-FOS to replace missing wind turbine targets after the area potential has been reached
	A) X% of the area in bird priority zones covered with WT (km2)
	Area potential WT that can be reached (km2)		93.24	93.24	93.24
	Capacity potential of WT (MW) associated with the area potential achieved		2731.93	2731.93	2731.93
	Area balance in % WT		1.36276	1.36276	1.36276
	Area still to be identified (%) in balance with energy targets		-0.837241	-0.437241	-0.637241
	Area still to be identified (%) in balance with energy targets positive value		0.837241	0.437241	0.637241
	Area yet to be identified (km2) in balance with energy targets		57.284	29.916	43.6
	Output to be achieved with WT on the area still required (MW)		1678.42	876.539	1277.48
	With PV-FOS, the power to be achieved conveRKed into the area requirement (km2)		16.9537	8.85393	12.9038
	Area balance in % for PV-FOS		0.247789	0.129406	0.188597
	Balance of area availability PV-FOS and necessary area requirement to achieve wind turbine targets with PV		0.314247	0.432631	0.373439
	Space requirement for PV expansion targets (km2)		0.0090456	0.18847	0.0412662
	Balance of space requirements for PV expansion targets and increase in wind deficit with PV (km2)		-0.238744	0.0590642	-0.147331
	B) X % of the area in bird priority zones covered with WT (km2)
	Area potential WT that can be reached (km2)		153.818	153.818	153.818
	Capacity potential of WT (MW) associated with the area potential achieved		2731.93	2731.93	2731.93
	Area balance in % WT		2.24815	2.24815	2.24815
	Area still to be identified (%) in balance with energy targets		0.0481459	0.448146	0.248146
	Area still to be identified (%) in balance with energy targets positive value		-0.0481459	-0.448146	-0.248146
	Area yet to be identified (km2) in balance with energy targets		-3.29414	-30.6621	-16.9781
	Output to be achieved with WT on the area still required (MW)		-96.5184	-898.401	-497.46
	With PV-FOS, the power to be achieved conveRKed into the area requirement (km2)		-0.974934	-9.07476	-5.02484
	Area balance in % for PV-FOS		-0.0142493	-0.132633	-0.0734412
	Balance of area availability PV-FOS and necessary area requirement to achieve wind turbine targets with PV		0.576286	0.69467	0.635478
	Space requirement for PV expansion targets (km2)		0.271084	0.450508	0.303305
	Balance of space requirements for PV expansion targets and increase in wind deficit with PV (km2)		0.285333	0.583141	0.376746
6	Status quo PV-FOS on EEG base areas with bird priority zones
	A) PV-FOS are expanded according to the EEG area setting and 100% in bird priority zoness
	Output potential on EEG base areas (MWp)		3807	3807	3807
	Area potential PV-FOS EEG base areas (km2)		38.4545	38.4545	38.4545
	Area balance in %		0.562037	0.562037	0.562037
	Balance of energy targets and available space		0.256835	0.317875	0.229864
7	PV-FOS in bird priority zones in the energy mix
	A) X% of the possible output of PV-FOS in bird priority zones
	Additional area potential (km2)		0	0	0
	Additional power potential (MW)		0	0	0
	Area balance in km2 (status quo maximum) (km2)		21.4247	21.4247	21.4247
	Area balance in %		0.313135	0.313135	0.313135
	Power balance in MW		2121.04	2121.04	2121.04
	Balance of energy targets and available space		0.00793322	0.0689735	-0.0190381
	B) X% of the possible power of PV-FOS in bird priority zones
	Additional area potential (km2)		1.70299	1.70299	1.70299
	Additional power potential (MWp)		168.596	168.596	168.596
	Area balance in km2 (status quo maximum) (km2)		23.1277	23.1277	23.1277
	Area balance in %		0.338025	0.338025	0.338025
	Output balance in MWp		2289.64	2289.64	2289.64
	Balance of energy targets and available space		0.0328234	0.0938637	0.00585209
	C) X% of possible power of PV-FOS in bird priority zones
	Additional area potential (km2)		3.40597	3.40597	3.40597
	Additional power potential (MWp)		337.191	337.191	337.191
	Area balance in km2 (status quo maximum) (km2)		24.8307	24.8307	24.8307
	Area balance in %		0.362915	0.362915	0.362915
	Output balance in MWp		2458.24	2458.24	2458.24
	Balance of energy targets and available space		0.0577136	0.118754	0.0307423
8	VeRKical PV in bird priority zones
	A) X% of the possible power of veRKical PV in bird priority zones
	Additional area potential (km2)		2.40851	2.40851	2.40851
	Additional power potential (MW)		84.2978	84.2978	84.2978
	Area balance in km2 (status quo maximum) (km2)		63.0098	63.0098	63.0098
	Area balance in %		0.920926	0.920926	0.920926
	Power balance in MW		2205.34	2205.34	2205.34
	Balance of energy targets and available space		0.615724	0.676765	0.588753
	B) X% of the possible power of veRKical PV-FOS in bird priority zones
	Additional area potential (km2)		4.81702	4.81702	4.81702
	Additional power potential (MW)		168.596	168.596	168.596
	Area balance in km2 (status quo maximum) (km2)		65.4183	65.4183	65.4183
	Area balance in %		0.956128	0.956128	0.956128
	Power balance in MW		2289.64	2289.64	2289.64
	Balance of energy targets and available space		0.650926	0.711967	0.623955
	C) X% of the possible power of veRKical PV-FOS in bird priority zones
	Additional area potential (km2)		9.63403	9.63403	9.63403
	Additional power potential (MW)		337.191	337.191	337.191
	Area balance in km2 (status quo maximum) (km2)		70.2353	70.2353	70.2353
	Area balance in %		1.02653	1.02653	1.02653
	Power balance in MW		2458.24	2458.24	2458.24
	Balance of energy targets and available space		0.72133	0.78237	0.694359
9	PV-FOS and WT together in a bird priority zones
	A) X% of the possible output of PV-FOS in bird priority zoness and 5% of the area built up with WT (sub-scenarios B)
	Additional area potential (km2)		62.2811	62.2811	62.2811
	Additional power potential (MW)
	Area balance in km2 (status quo maximum) (km2)		239.227	239.227	239.227
	Area balance in %		3.49645	3.49645	3.49645
	Power balance in MW
	Balance of energy targets and available space		0.991246	1.45229	1.16427
	bird priority zoness and efficient locations for WT
10	A) X% of the area of the WT in bird priority zones if the wind speed is >5.5 m/sec
	Additional potential in bird priority zoness on efficient locations (km2)		307	307	307
	Additional area potential (km2)		30.7	30.7	30.7
	Additional power potential (MW)		899.51	899.51	899.51
	Area balance in km2 (status quo maximum) (km2)		123.94	123.94	123.94
	Area balance in %		1.81146	1.81146	1.81146
	Power balance in MW		3631.44	3631.44	3631.44
	number of plants		726.288	726.288	726.288
	Balance of energy targets and available space		-0.388541	0.0114586	-0.188541
	B) X% of the area of the WT in bird priority zones if the wind speed is >5.5 m/s
	Additional potential in bird priority zoness on efficient locations (km2)		307	307	307
	Additional area potential (km2)		15.35	15.35	15.35
	Additional power potential (MW)		449.755	449.755	449.755
	Area balance in km2 (status quo maximum) (km2)		108.59	108.59	108.59
	Area balance in %		1.58711	1.58711	1.58711
	Power balance in MW		3181.69	3181.69	3181.69
	number of plants		636.337	636.337	636.337
	Balance of energy targets and available space		-0.612891	-0.212891	-0.412891
11	bird priority zones and higher power requirements
	A) WT in bird priority zoness if they are installed in a 1 km strip with a BImSch buffer of 800 m
	Additional potential in bird priority zoness on efficient locations (km2)		556	556	556
	Additional area potential (km2)
	Additional power potential (MW)
	Area balance in km2 (status quo maximum) (km2)		649.24	649.24	649.24
	Area balance in %		9.48904	9.48904	9.48904
	Power balance in MW		278.029	278.029	278.029
	number of plants		55.6058	55.6058	55.6058
	Balance of energy targets and available space		7.28904	7.68904	7.48904
12	bird priority zones and network convenience
	A) WT in bird priority zones, if bird priority zones <5 km at 110 kV substation
	Additional potential in bird priority zoness on grid-friendly locations (km2)		323	323	323
	Additional area potential (km2)
	Additional power potential (MW)		9463.9	9463.9	9463.9
	Area balance in km2 (status quo maximum) (km2)		416.24	416.24	416.24
	Area balance in %		6.0836	6.0836	6.0836
	Power balance in MW		12195.8	12195.8	12195.8
	number of plants		2439.17	2439.17	2439.17
	Balance of energy targets and available space		3.8836	4.2836	4.0836
13	bird priority zones and without species buffers under species protection law
	Total area of planning space
	Space requirement bird priority zones approach RK 1 (km2)		6842	1211.56	1211.56
	Space requirement taboo criteria (km2)		1211.56	0	0
	Area potential for WT (km2)		222	222	222
	Area potential WT (%)		3.24467	3.24467	3.24467
	Installable power (MW)		6504.6	6504.6	6504.6
	attachment count		1300.92	1300.92	1300.92
	Balance of energy targets and available space		1.04467	1.44467	1.24467
14	bird priority zones and settlement distances
	A) Settlement distances according to BImSchG (800 m) and exclusion of bird priority zoness
	Area potential for WT without species buffers (km2)		271	271	271
	species buffer correction factor according to regional plan 3.0 HF		0.58	0.58	0.58
	Conclusion species buffer-free area		0.42	0.42	0.42
	Area potential for WT with species buffer correction factor (km2)		113.82	113.82	113.82
	Area potential WT with species buffer correction factor (%)		1.66355	1.66355	1.66355
	Installable power (MW)		3334.93	3334.93	3334.93
	attachment count		666.985	666.985	666.985
	Balance of energy targets and available space		-0.536451	-0.136451	-0.336451
15	bird priority zones and wind turbine in the forest
	B) X% of the forest area (mixed forest) with WT and the exclusion of bird priority zoness
	Additional area potential in the forest (km2)		54.1842	54.1842	54.1842
	Additional power potential (MW)		1587.6	1587.6	1587.6
	Area balance in km2 (status quo maximum) (km2)		147.424	147.424	147.424
	Area balance in %		2.15469	2.15469	2.15469
	Power balance in MW		4319.53	4319.53	4319.53
	number of plants		863.906	863.906	863.906
	Balance of energy targets and available space		-0.0453055	0.354695	0.154695
	C) X% of the forest area (mixed forest) with WT and the exclusion of bird priority zoness
	Additional area potential in the forest (km2)		27.0921	27.0921	27.0921
	Additional power potential (MW)		793.799	793.799	793.799
	Area balance in km2 (status quo maximum) (km2)		120.332	120.332	120.332
	Area balance in %		1.75873	1.75873	1.75873
	Power balance in MW		3525.73	3525.73	3525.73
	number of plants		705.146	705.146	705.146
	Balance of energy targets and available space		-0.441273	-0.041273	-0.241273
16	bird priority zones and landscape protection areas
	A) X% WT in landscape protection areas and exclusion of bird priority zones
	Additional area potential in the forest (km2)		75.6196	75.6196	75.6196
	Additional power potential (MW)		2215.65	2215.65	2215.65
	Area balance in km2 (status quo maximum) (km2)		168.86	168.86	168.86
	Area balance in %		2.46799	2.46799	2.46799
	Power balance in MW		4947.59	4947.59	4947.59
	number of plants		989.517	989.517	989.517
	Balance of energy targets and available space		0.267985	0.267985	0.267985
	B) X% WT in landscape protection areas and exclusion of bird priority zones
	Additional area potential in the forest (km2)		25.2065	25.2065	25.2065
	Additional power potential (MW)		738.551	738.551	738.551
	Area balance in km2 (status quo maximum) (km2)		118.447	118.447	118.447
	Area balance in %		1.73117	1.73117	1.73117
	Power balance in MW		3470.48	3470.48	3470.48
	number of plants		694.097	694.097	694.097
	Balance of energy targets and available space		-0.468832	-0.0688319	-0.268832
17	Status Quo Agri PV-FOS with bird priority zones
	A) Agri PV-FOS are expanded on agricultural land (number of fields <23) and thus 100% in bird priority zones
	Output potential on agricultural land (MWp)		4969	4969	4969
	Area potential Agri PV-FOS (km2)		124.225	124.225	124.225
	Area balance in %		1.81562	1.81562	1.81562
	Balance of energy targets and available space		1.51042	1.57146	1.48345
18	A) X% of the possible output of PV-FOS in bird priority zones
	Additional area potential (km2)		0	0	0
	Additional power potential (MW)		0	0	0
	Area balance in km2 (status quo maximum) (km2)		69.2111	69.2111	69.2111
	Area balance in %		1.01156	1.01156	1.01156
	Power balance in MW		2768.44	2768.44	2768.44
	Balance of energy targets and available space		0.706361	0.767401	0.679389
	B) X% of the possible power of PV-FOS in bird priority zones
	Additional area potential (km2)		5.50139	5.50139	5.50139
	Additional power potential (MWp)		220.056	220.056	220.056
	Area balance in km2 (status quo maximum) (km2)		74.7125	74.7125	74.7125
	Area balance in %		1.09197	1.09197	1.09197
	Output balance in MWp		2988.5	2988.5	2988.5
	Balance of energy targets and available space		0.786767	0.847807	0.759795
	C) X% of possible power of PV-FOS in bird priority zones
	Additional area potential (km2)		11.0028	11.0028	11.0028
	Additional power potential (MWp)		440.111	440.111	440.111
	Area balance in km2 (status quo maximum) (km2)		80.2139	80.2139	80.2139
	Area balance in %		1.17237	1.17237	1.17237
	Output balance in MWp		3208.55	3208.55	3208.55
	Balance of energy targets and available space		0.867173	0.928213	0.840202
19	bird priority zones and nature park
	A) X% WT in nature park and exclusion of bird priority zoness
	Additional area potential in nature parks (km2)		78.1972	78.1972	78.1972
	Additional power potential (MW)		2291.18	2291.18	2291.18
	Area balance in km2 (status quo maximum) (km2)		171.437	171.437	171.437
	Area balance in %		2.50566	2.50566	2.50566
	Power balance in MW		5023.11	5023.11	5023.11
	number of plants		1004.62	1004.62	1004.62
	Balance of energy targets and available space		0.305659	0.705659	0.505659
	B) X% WT in nature park and exclusion of bird priority zoness
	Additional area potential in nature parks (km2)		39.0986	39.0986	39.0986
	Additional power potential (MW)		1145.59	1145.59	1145.59
	Area balance in km2 (status quo maximum) (km2)		132.339	132.339	132.339
	Area balance in %		1.93421	1.93421	1.93421
	Power balance in MW		3877.52	3877.52	3877.52
	number of plants		775.504	775.504	775.504
	Balance of energy targets and available space		-0.265791	0.134209	-0.0657907
20	bird priority zones and open space
	A) X % WT in open space and exclusion of bird priority zones
	Additional area potential in nature parks (km2)		63.6052	63.6052	63.6052
	Additional power potential (MW)		1863.63	1863.63	1863.63
	Area balance in km2 (status quo maximum) (km2)		156.845	156.845	156.845
	Area balance in %		2.29239	2.29239	2.29239
	Power balance in MW		4595.56	4595.56	4595.56
	number of plants		919.113	919.113	919.113
	Balance of energy targets and available space		0.0923882	0.492388	0.292388
	B) X % WT in open space and exclusion of bird priority zoness
	Additional area potential in nature parks (km2)		31.8026	31.8026	31.8026
	Additional power potential (MW)		931.816	931.816	931.816
	Area balance in km2 (status quo maximum) (km2)		125.043	125.043	125.043
	Area balance in %		1.82757	1.82757	1.82757
	Power balance in MW		3663.75	3663.75	3663.75
	number of plants		732.75	732.75	732.75
	Balance of energy targets and available space		-0.372426	0.0275738	-0.172426
